# Supplementary material for: Plasma extracellular vesicle tau and TDP-43 as diagnostic biomarkers in FTD and ALS
Source: PubMed Central journal article supplement (PMC11186765; doi:10.1038/s41591-024-02937-4), 2024-06-18
Supplement: 41591_2024_2937_MOESM1_ESM.pdf [file 41591_2024_2937_MOESM1_ESM.pdf]

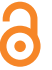

---

# Plasma extracellular vesicle tau and TDP-43 as diagnostic biomarkers in FTD and ALS

---

In the format provided by the authors and unedited

---

## 1 **Supplementary Files**

## 2 **Supplementary Results**

### 3 **Characterization of EV preparations**

4 EV preparations were characterized by Western Blot for the presence of the typical EV marker  
5 protein Flotillin-2 and the absence of Calnexin to rule out contamination of the preparations with  
6 microsomal fractions (Suppl. Fig.1a, b). Nanoparticle tracking analysis (NTA) revealed a size range of  
7 80 to 150 nm for the sEV preparation and of 100 to 400 nm for the mEV fraction (Suppl. Fig.1c, d).  
8 Transmission electron microscopy (TEM) showed the typical cup-shaped morphology of EVs (Suppl.  
9 Fig.1e, f).

### 10 **Characterization of EV Tau by LC-MS/HRMS**

11 Since the lipid bilayer membrane can protect EV cargo from degradation, we hypothesized that EVs  
12 may contain full-length Tau and thus allow the quantification of Tau isoforms, which is otherwise  
13 hampered by Tau fragmentation. We solubilized plasma and CSF EVs prepared from 10 ml of pooled  
14 samples with 0.5% NP40 and 2.5 mM guanidine prior to Tau immunopurification. To determine the  
15 abundance of 3 and 4R Tau isoforms (Suppl. Fig.2a) and Tau fragmentation status, we performed  
16 liquid chromatography and tandem high resolution mass spectrometry (LC-MS/HRMS) (Suppl.  
17 Fig.2b). Eleven Tau peptides were detected, including peptides specific to the repeat region (peptides  
18 7-10). 4R Tau isoforms are characterized by the presence of the second repeat and were identified by  
19 detection of peptides 8 (residues 282-290 in the second repeat) and 9 (residues 299-321 spanning  
20 the transition from the second to third repeat) (Suppl.Fig.2b). In neat CSF, extremely low levels were  
21 detected for peptides 7-10 which cover the repeat region, compared to mid domain specific peptides  
22 1-5 (Suppl.Fig. 2c). This data is consistent with the previously described fragmentation of Tau's  
23 microtubule binding repeat region in extracellular fluids, including plasma<sup>1</sup>. In contrast, in CSF sEV  
24 and mEV fractions, 4R Tau specific peptides 8 and 9 were highly abundant, suggesting that CSF EVs  
25 mainly contain the full microtubule-binding repeat region of Tau (Suppl. Fig.2b).

### 26 **Plasma EVs contain TDP-43**

27 We first tested the specificity of the SIMOA assay in SY5Y cell lysates upon RNAi-mediated down-  
28 regulation of endogenous TDP-43 with scrambled siRNA as a control. We found RNAi-mediated  
29 downregulation of TDP-43 as quantified by Western blot analysis (86.12% compared to scrambled  
30 control,  $p < 0.0001$ ) and SIMOA assay (81.29% downregulation,  $p < 0.0001$ ) (Suppl. Fig.10a,c). In  
31 contrast, spiking of SY5Y cell lysates with recombinant TDP-43 protein resulted in appropriate  
32 increase of TDP-43 protein concentrations as determined by SIMOA assay (96.33% recovery) (Suppl.  
33 Fig.12d). We then tested the assay performance specifically with plasma sEV and mEV preparations,  
34 as the manufacturer's assay performance parameters were determined for plasma, not EVs (Suppl.  
35 Table 1).

### 36 **Gaussian Mixture Modelling**

37 Mixture modeling has been successfully used in research on Alzheimer's disease to derive cut-offs for  
38 amyloid pathology in a setting where a gold standard neuropathological outcome has been  
39 unavailable<sup>2</sup>. Cut-offs were derived in a sample excluding neuropathologically or genetically  
40 confirmed cases which was subsequently used for validating cut-offs. In line with visual inspection  
41 (Suppl. Fig.15), bootstrapping suggested that the distributions of sEV 3R/4R Tau ratios and sEV TDP-  
42 43 were best approximated by three normal distributions since it showed a significantly better fit to  
43 the data compared to a single Gaussian distribution (plasma sEV 3R/4R tau ratio:  $p = 0.001$ ; sEV TDP-  
44 43:  $p = 0.01$ ) or two Gaussians (plasma sEV 3R/4R tau ratio:  $p = 0.001$ ; sEV TDP-43:  $p = 0.01$ ) but was not

1 further improved by modeling four Gaussian distributions (plasma sEV 3R/4R tau ratio:  $p=0.06$ ; sEV  
2 TDP-43:  $p=0.2$ ). Cut-offs were derived based on the intersection of the middle Gaussian distribution  
3 with the two more extreme distributions

#### 4 **Suppl. Discussion**

##### 5 **Differences in group sizes (DESCRIBE cohort)**

6  
7 Group sizes in DESCRIBE subcohorts 1 and 2 were imbalanced which could have impacted the  
8 precision of the AUC estimates. We compared AUC results and 95% CI intervals between DESCRIBE  
9 subcohorts and the Sant Pau cohort which has more balanced diagnostic group sample sizes. As  
10 shown in Suppl. Table 20 even based on the lower bounds of the 95% CI intervals, plasma EV Tau  
11 ratio and plasma EV TDP-43 levels showed a good discriminative performance. Furthermore, in the  
12 Sant Pau cohort, we obtained AUCs and CIs comparable to DESCRIBE subcohort 2. In addition, we  
13 calculated precision recall curves and area under the precision recall curve (AUPRC) for all cohorts,  
14 since AUPRC reflect imbalanced group sizes (Suppl. Tables 21 and 22). AUPRC values were above 0.8  
15 for plasma sEV Tau ratios and TDP-43 levels in both DESCRIBE subcohorts, further supporting the  
16 very good diagnostic performance of both markers.

17

#### 18 **Supplementary Methods**

##### 19 *Modified version of the Cambridge Behavioural Inventory (CBI-M)*

20 In the DESCRIBE-FTD cohort, we used a modified 50-item version of the CBI-R. Before including this  
21 new version into the analyses, we conducted a principal component analysis (PCA) with varimax  
22 rotation to confirm the theoretical factor structure. Participants with over 20% missing rate over all  
23 items were removed. In addition, one item with over 20% missing rate across all participants was  
24 excluded. Four further items were excluded due to the low factor loadings and cross-loadings.  
25 Therefore, the modified version (CBI-M) resulted in 45 items with 12 new items and 33 items from  
26 the CBI-R. The total CBI-M score was calculated by the mean of all available item scores for each  
27 bvFTD participant.

28

##### 29 *Transmission electron Microscopy (TEM)*

30 TEM was performed as described previously<sup>3</sup>. Formvar coated copper grids (150 hexagonal mesh,  
31 Science Services, Munich, Germany) were incubated for 10 min on top of 10  $\mu$ l droplets containing EV  
32 preparations. After 5 times PBS washing, grids were incubated first on water droplets and then 5 min  
33 on uranyl acetate-oxalate droplets (1:9 dilution of 4% uranyl acetate in 2% methylcellulose). Samples  
34 were imaged with a LEO912 transmission electron microscope (Carl Zeiss Microscopy, Oberkochen,  
35 Germany) equipped with an on-axis 2k CCD camera (TRS, Moorenweis, Germany).

36

##### 37 *Cell Culture&siRNA transfection*

38 Cells of the human neuroblastoma-derived SH-SY5Y cell line were maintained in DMEM,  
39 supplemented with 10% fetal bovine serum (FBS), 1mM glutamine, 100U/mL penicillin and 100  
40  $\mu$ g/mL streptomycin in a humidified incubator with 5% CO<sub>2</sub> at 37°C.

41 For siRNA-mediated knock-down of TDP-43, the following siRNA sequences were used<sup>4</sup>:

42 siTDP-43 sense: GCGGGAAAAGUAAAAGAUGUU

43 siTDP-43 antisense: AACAUUUUUACUUUUCCCGC

44 scrambled siRNA sense: AUCCCGCUAGGCCAUUCAAGUU

45 scrambled siRNA antisense: AACUUGAAUGCCUAGGGGAU.

46 Scrambled siRNA was used as a negative control. siRNAs were transfected into  $1 \times 10^6$  SH-SY5Y cells  
47 using RNAiMax transfection reagent (Invitrogen, catalog# 13778150) according to the manufacturer's  
48 instructions. The cells were lysed with Tris-HCl, pH 8.0, 250 mM NaCl, 0.5% NP-40, 1 mM EDTA, 1 mM

1 DTT, and 1× protease inhibitors (Thermo Scientific, catalog#A32965) 72 hours after transfection. The  
2 siRNA knockdown efficiency was evaluated by Western Blotting using BioRad Image lab software  
3 (Image Lab 6.1 (BioRad, USA).  
4

#### 5 *Immunoprecipitation-Mass Spectrometry (IP-MS)*

6 Tau was immunopurified, then digested as previously described and multiple tau peptides were  
7 quantified using high resolution mass spectrometry (MS)<sup>5</sup> from plasma and CSF sEV and mEV  
8 preparations (pooled samples, corresponding to 10 ml starting volume of plasma and CSF,  
9 respectively). Prior to immunopurification, 2.5 ng of fully 15 N-labeled 441(2N4R) tau internal  
10 standard was mixed with CSF or plasma fractions and diluted in 0.5% NP40, 2.5 mM guanidine and  
11 protease inhibitors. Tau was immunopurified by incubating the samples with Tau1 (provided by Drs.  
12 Nicholas Kanaan and Lester Binder) and HJ8.5 (provided by Dr. David Holtzman) antibodies at room  
13 temperature for 4 hours (3 mg antibody per g of beads)<sup>6</sup>. Immunopurified tau was digested for 16  
14 hours at 37°C with 400 ng of trypsin (Promega). The peptide mixture was purified by solid phase  
15 extraction on C18 TopTip (Glygen Corp, Columbia, MD). Eluates were dried, resuspended and  
16 transferred in MS vials. Samples were subjected to liquid chromatography and tandem high  
17 resolution mass spectrometry (LC-MS/HRMS) analysis on a nanoAcquity UPLC system (Waters,  
18 Mildford, Massachusetts) coupled to an Orbitrap Tribrid Fusion MS (Thermo Scientific, San Jose,  
19 California) operating in PRM mode. MS/HRMS transitions were extracted using Skyline version  
20 22.2.2.278 (MacCoss lab, University of Washington). Tau peptides concentrations were calculated  
21 using measured ratios between MS/HRMS transitions of endogenous non-phosphorylated peptides  
22 and 15N labeled peptides from the protein internal standard on peptides 151-155, 156-163, 181-190,  
23 195-209, 212-221, 226-230, 260-267, 282-290, 299-321, 354-369 and 396-406.  
24

#### 25 *Preparation of recombinant Tau protein*

26 hTau23 (0N3R, 352 residues) is the shortest Tau ((UniProt ID 10636) isoform in human CNS  
27 containing 3 repeats, whereas hTau40 (2N4R, 441 residues) is the longest Tau isoform with 4 repeats  
28 and two N-terminal inserts (Suppl. Fig. 2). Recombinant Tau protein was prepared from Escherichia  
29 coli BL21(DE) strains expressing either hTau23 or hTau40 as described<sup>7</sup>. Purity of recombinant Tau  
30 and isoform specificity of 3R and 4R Tau antibodies were analyzed by Western Blotting.  
31

#### 32 *Assay Validation*

33 Assay validation was performed according to the guidelines published in Andreasson *et al.*<sup>8</sup>.  
34 **Sensitivity:** For the determination of the lower limit of quantification (LLOQ) of each assay, 16 blank  
35 samples were measured on one plate. The calibration curves were calculated using a four-parameter  
36 logistic curve fit for all assays, which gave the optimal fit. LLOQ was calculated as the concentration  
37 corresponding to the 2.5 signal standard deviation above the background (zero calibrator **Precision:**  
38 Intra-assay variation (repeatability) was determined by analysis of samples (n=5) in four replicates on  
39 one plate. Inter-assay variation (intermediate precision) was measured to determine the variation of  
40 analyses between 5 different days. **Dilutional linearity:** Three different EV samples were used in  
41 duplicates to perform the dilution linearity experiments. The dilutional linearity (dilutions 2x, 4x and  
42 8x) was calculated as follows: %Linearity = [observed C \*dilution factor/ previous observed  
43 C\*previous dilution factor] \*100; C = concentration(pg/mL). **Recovery:** Three different plasma EV  
44 samples, measured in duplicates, were spiked with recombinant 3R Tau, 4R Tau, and TDP43  
45 calibrator at three different concentrations (low: 3R and 4R Tau 1,750 pg/mL, TDP-43 1,250 pg/mL;  
46 medium: 3R and 4R Tau 3,500 pg/mL, TDP-43 2,500 pg/mL; high: 3R and 4R Tau 7,000 pg/mL, TDP-43  
47 5,000 pg/mL). For neat samples, the buffer was spiked instead of the calibrator. Spike recoveries  
48 were calculated according to the formula: % Recovery = [C spike sample-C neat sample /theoretical C  
49 spike] \*100; C = concentration (pg/mL). **Parallelism:** Three different EV samples with high  
50 endogenous protein concentrations were serially diluted (2x, 4x and 8x). Both reciprocal relative  
51 dilution factor and OD450 absorbance signals of the samples and calibrator were log-transformed  
52 and linear regression was performed to calculate the slopes of the sample and calibrator curves. The

1 slope of the linear parts of the log–log transformed calibrator and sample dilution series were  
2 compared to determine the degree of parallelism by calculating the “in range%” using the following  
3 formula: in range% = [slope of sample dilution /series slope of calibration curve] \*100.

#### 4 **Supplementary References**

- 5 1 Barthelemy, N. R., Horie, K., Sato, C. & Bateman, R. J. Blood plasma  
6 phosphorylated-tau isoforms track CNS change in Alzheimer's disease. *J Exp Med* **217**  
7 (2020). <https://doi.org:10.1084/jem.20200861>
- 8 2 Bertens, D., Tijms, B. M., Scheltens, P., Teunissen, C. E. & Visser, P. J. Unbiased  
9 estimates of cerebrospinal fluid beta-amyloid 1-42 cutoffs in a large memory clinic  
10 population. *Alzheimers Res Ther* **9**, 8 (2017). [https://doi.org:10.1186/s13195-016-](https://doi.org:10.1186/s13195-016-0233-7)  
11 [0233-7](https://doi.org:10.1186/s13195-016-0233-7)
- 12 3 Stuendl, A. *et al.* alpha-Synuclein in Plasma-Derived Extracellular Vesicles Is a  
13 Potential Biomarker of Parkinson's Disease. *Mov Disord* **36**, 2508-2518 (2021).  
14 <https://doi.org:10.1002/mds.28639>
- 15 4 Kawaguchi, T. *et al.* Changes to the TDP-43 and FUS Interactomes Induced by DNA  
16 Damage. *J Proteome Res* **19**, 360-370 (2020).  
17 <https://doi.org:10.1021/acs.jproteome.9b00575>
- 18 5 Barthelemy, N. R. *et al.* Site-Specific Cerebrospinal Fluid Tau Hyperphosphorylation  
19 in Response to Alzheimer's Disease Brain Pathology: Not All Tau Phospho-Sites are  
20 Hyperphosphorylated. *J Alzheimers Dis* **85**, 415-429 (2022).  
21 <https://doi.org:10.3233/JAD-210677>
- 22 6 Sato, C. *et al.* Tau Kinetics in Neurons and the Human Central Nervous System.  
23 *Neuron* **97**, 1284-1298 e1287 (2018). <https://doi.org:10.1016/j.neuron.2018.02.015>
- 24 7 Friedhoff, P., Schneider, A., Mandelkow, E. M. & Mandelkow, E. Rapid assembly of  
25 Alzheimer-like paired helical filaments from microtubule-associated protein tau  
26 monitored by fluorescence in solution. *Biochemistry* **37**, 10223-10230 (1998).  
27 <https://doi.org:10.1021/bi980537d>
- 28 8 Andreasson, U. *et al.* A Practical Guide to Immunoassay Method Validation. *Front*  
29 *Neurol* **6**, 179 (2015). <https://doi.org:10.3389/fneur.2015.00179>
- 30 9 Cummings, J. L. *et al.* The Neuropsychiatric Inventory: comprehensive assessment of  
31 psychopathology in dementia. *Neurology* **44**, 2308-2314 (1994).  
32 <https://doi.org:10.1212/wnl.44.12.2308>
- 33 10 Pfeffer, R. I., Kurosaki, T. T., Harrah, C. H., Jr., Chance, J. M. & Filos, S.  
34 Measurement of functional activities in older adults in the community. *J Gerontol* **37**,  
35 323-329 (1982). <https://doi.org:10.1093/geronj/37.3.323>
- 36 11 Golbe, L. I. The Medical Advisory Board of the Society for Progressive Supranuclear  
37 Palsy. A clinical rating scale and staging system for progressive supranuclear palsy. .  
38 *Neurology* **48:A326**. (1997).
- 39 12 Goetz, C. G. *et al.* Movement Disorder Society-sponsored revision of the Unified  
40 Parkinson's Disease Rating Scale (MDS-UPDRS): Process, format, and clinimetric  
41 testing plan. *Mov Disord* **22**, 41-47 (2007). <https://doi.org:10.1002/mds.21198>
- 42 13 Starkstein, S. E. *et al.* Reliability, validity, and clinical correlates of apathy in  
43 Parkinson's disease. *J Neuropsychiatry Clin Neurosci* **4**, 134-139 (1992).  
44 <https://doi.org:10.1176/jnp.4.2.134>
- 45 14 Schrag, A. *et al.* Measuring quality of life in PSP: the PSP-QoL. *Neurology* **67**, 39-44  
46 (2006). <https://doi.org:10.1212/01.wnl.0000223826.84080.97>
- 47 15 Folstein, M. F., Folstein, S. E. & McHugh, P. R. "Mini-mental state". A practical  
48 method for grading the cognitive state of patients for the clinician. *J Psychiatr Res* **12**,  
49 189-198 (1975). [https://doi.org:10.1016/0022-3956\(75\)90026-6](https://doi.org:10.1016/0022-3956(75)90026-6)

1 16 Nasreddine, Z. S. *et al.* The Montreal Cognitive Assessment, MoCA: a brief screening  
2 tool for mild cognitive impairment. *J Am Geriatr Soc* **53**, 695-699 (2005).  
3 <https://doi.org:10.1111/j.1532-5415.2005.53221.x>  
4 17 Golbe, L. I. & Ohman-Strickland, P. A. A clinical rating scale for progressive  
5 supranuclear palsy. *Brain* **130**, 1552-1565 (2007).  
6 <https://doi.org:10.1093/brain/awm032>  
7 18 Piot, I. *et al.* The Progressive Supranuclear Palsy Clinical Deficits Scale. *Mov Disord*  
8 **35**, 650-661 (2020). <https://doi.org:10.1002/mds.27964>  
9 19 Schwab RS, E. A. Projection technique for evaluating surgery in Parkinson's disease. .  
10 *In: Billingham FH, Donaldson MC, editors. Third Symposium on Parkinson's Disease.*  
11 *Edinburgh: Churchill Livingstone*, 152–157 (1969).  
12 20 Guy, W. The clinical global impression scale. *In: ECDEU Assessment Manual for*  
13 *Psychopharmacology - Revised (DHEW Publ No ADM 76-338).* (1976).  
14 21 Hughes, C. P., Berg, L., Danziger, W. L., Coben, L. A. & Martin, R. L. A new clinical  
15 scale for the staging of dementia. *Br J Psychiatry* **140**, 566-572 (1982).  
16 <https://doi.org:10.1192/bjp.140.6.566>  
17 22 Knopman, D. S., Weintraub, S. & Pankratz, V. S. Language and behavior domains  
18 enhance the value of the clinical dementia rating scale. *Alzheimers Dement* **7**, 293-299  
19 (2011). <https://doi.org:10.1016/j.jalz.2010.12.006>  
20 23 Wear, H. J. *et al.* The Cambridge Behavioural Inventory revised. *Dement*  
21 *Neuropsychol* **2**, 102-107 (2008). [https://doi.org:10.1590/S1980-](https://doi.org:10.1590/S1980-57642009DN20200005)  
22 [57642009DN20200005](https://doi.org:10.1590/S1980-57642009DN20200005)

23

24

25

26

27

28

29

30

31

32

33

34

35

36

37

1 **Supplementary Figures and figure legends**

2

3

**Supplementary Figure 1**

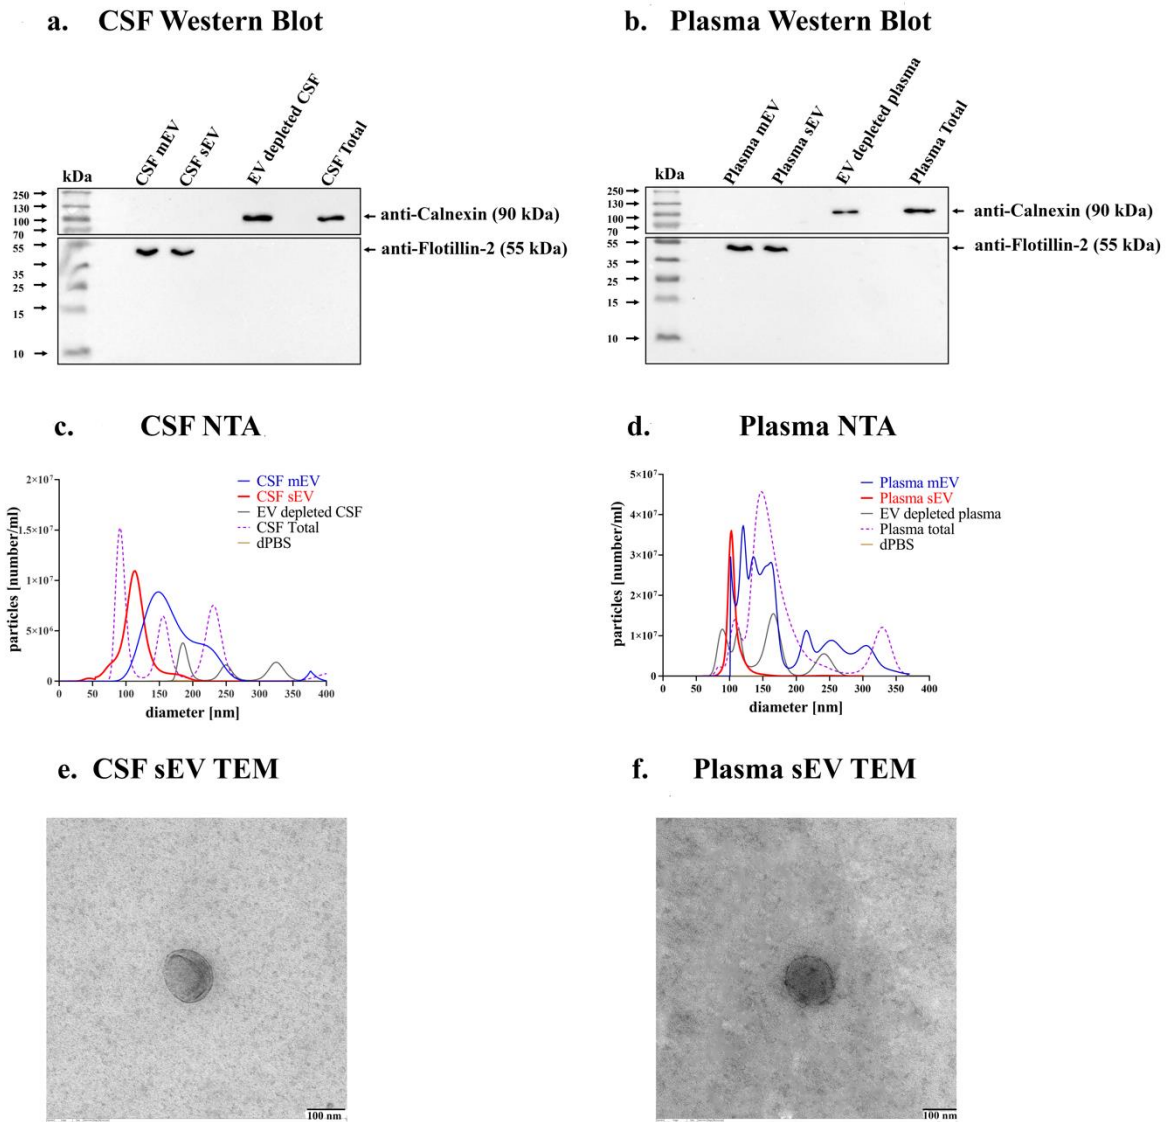

4

5 **Suppl. Figure 1. Characterization of CSF and plasma EVs** (CSF left column); plasma (right column)),  
6 using **(a,b)** Western blotting (WB) (n=3 independent experiments), **(c,d)** nanoparticle tracking  
7 analysis (NTA)(n=3 independent experiments), and **(e,f)** transmission electron microscopy (TEM) (n=2  
8 independent experiments).

9

10

11

## Supplementary Figure 2

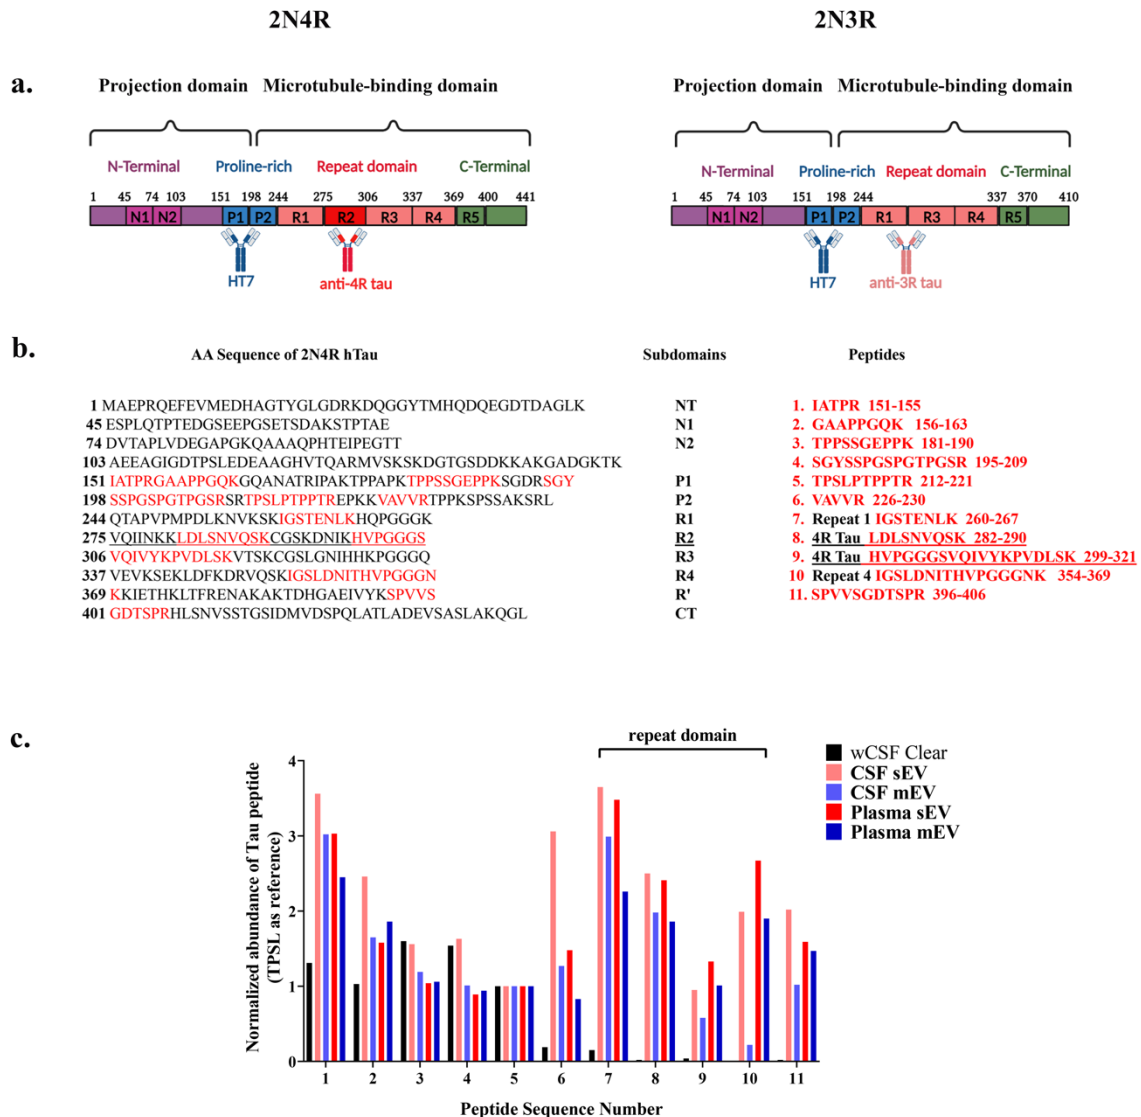

2  
3 **Suppl. Figure 2. EVs contain full-length Tau** Amino acid sequence, subdomains and tryptic peptides  
4 (red) of 4 Repeat and 3 Repeat isoform human Tau. **(a)** NT: N-terminus; N1, N2: N-terminal inserts;  
5 P1, P2: proline rich regions; R1-4: repetitive amino acids; R' pseudo-repeat; CT: C-terminus. 3R Tau  
6 isoforms are characterized by R1,R3,R4; 4R Tau by an additional repeat domain, R2. Anti-3R Tau  
7 antibody binds to an epitope spanning R1 and R3; anti-4R Tau is specific to R2. **(b)** Left: amino acid  
8 sequence of 2N4R human Tau, the longest Tau isoform. Right: Tryptic peptides. Peptide 7 is localized  
9 in R1, peptide 8 and 9 are specific to 4R Tau, peptide 10 is localized in repeat 4. **(c)** IP-MS results from  
10 neat CSF, CSF-derived mEV, sEV, plasma-derived mEV, sEV. Abundance of Tau peptides normalized to  
11 Tau mid-domain (peptide 5).

12

13

14



## Supplementary Figure 3

**a. Western Blot: anti-3R Tau antibody**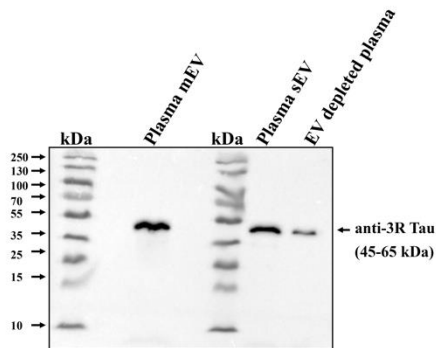**b. Western Blot: anti-4R Tau antibody**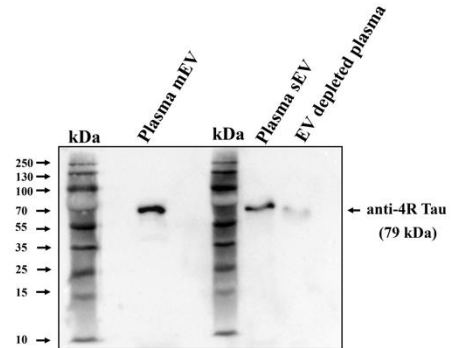**Antibody Specificity**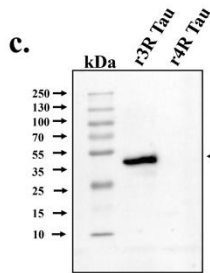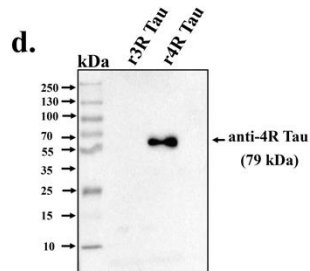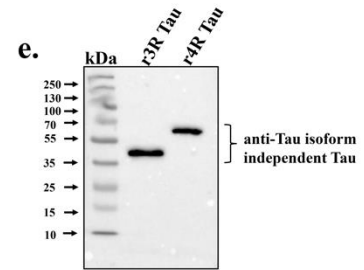

2

3

4

5

6

7

8

9

10

11

12

13

14

15

16

17

18

**Suppl. Figure 3. 3R and 4R Tau in plasma mEV and sEV.** (a) Western blot analysis of (lanes from left to right) plasma mEVs, sEVs, and EV-depleted plasma with antibodies directed against the 3R Tau isoform (n=3 independent experiments). (b) Western blot analysis of (lanes from left to right) plasma mEVs, sEVs, and EV-depleted plasma with antibodies directed against the 4R Tau isoform (n=3 independent experiments). (c) 3R Tau antibody specificity tested by Western blot analysis with recombinant 3R and 4R Tau proteins (n=3 independent experiments). (d) 4R Tau antibody specificity tested by Western blot analysis with recombinant 3R and 4R Tau proteins (n=3 independent experiments). (e) Western blot of recombinant 3R and 4R Tau with isoform-independent antibody HT7 (n=3 independent experiments).

## Supplementary Figure 4

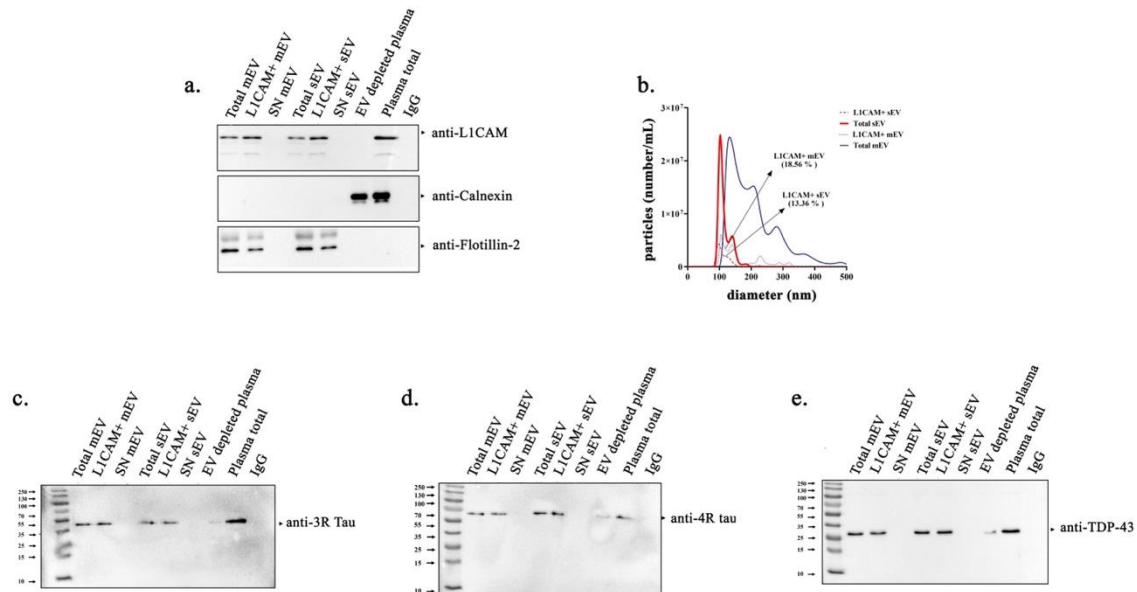

2

**Suppl. Figure 4. Detection of 3R, 4R Tau and TDP-43 in L1CAM immunisolated plasma EVs (a)** Preparation of total plasma EVs, L1CAM-immuno-isolated EVs from plasma EV preparations, supernatant (SN) of L1CAM beads after incubation with plasma EV preparations and centrifugation (=L1CAM EV cleared fraction) (Left to right: Total plasma mEV, L1CAM positive mEV, SN mEV (supernatant of L1CAM beads incubated with plasma mEV preparations after centrifugation, corresponding to L1CAM EV cleared supernatant), total plasma sEV, L1CAM positive sEV, SN sEV (supernatant of L1CAM beads incubated with plasma sEV preparations, after centrifugation), EV depleted plasma (after SEC preparation of total plasma EVs), plasma total, IgG bead immuno-isolation of total plasma sEVs as negative control for L1CAM bead immuno-isolation). WB analysis of L1CAM, Calnexin, and Flotillin-2. WB analysis revealed, that L1CAM was 2.40 fold enriched in the L1CAM-EV preparation obtained from mEVs ( $2.4 \pm 0.16$ ,  $n=3$  independent experiments) and 3.2 fold in L1CAM EVs prepared from sEVs ( $3.2 \pm 0.23$ ,  $n=3$  independent experiments; representative WB). **(b)** NTA analysis of L1CAM immuno-isolated plasma sEVs and mEVs, total plasma sEVs and mEVs. L1CAM EVs represent a subpopulation of total plasma EVs, based on NTA analysis of EV numbers in the different preparations (sEV: mean particle concentrations in L1CAM EV preparations:  $3.77 \times 10^8 \pm 5.86 \times 10^3$  SD particles/ml and total plasma EV  $2.82 \times 10^9 \pm 1.53 \times 10^5$  particles/ml; mEV: mean particle concentrations in L1CAM EV preparations:  $5.31 \times 10^8 \pm 3.87 \times 10^3$  particles/ml and total plasma EV  $2.86 \times 10^9 \pm 4.82 \times 10^6$  particles/ml). **(c)** WB analysis of 3R-Tau and **(d)** 4R Tau (Left to right: Total plasma mEV, L1CAM positive mEV, SN mEV (supernatant of L1CAM beads incubated with plasma mEV preparations after centrifugation), total plasma sEV, L1CAM positive sEV, SN sEV (supernatant of L1CAM beads incubated with plasma sEV preparations after centrifugation), EV depleted plasma (after SEC preparation of total plasma EVs), plasma total, IgG bead immuno-isolation of total plasma sEVs as negative control for L1CAM bead immuno-isolation). **(e)** WB analysis of TDP-43 (Left to right: Total plasma mEV, L1CAM positive mEV, SN mEV (supernatant of L1CAM beads incubated with plasma mEV preparations after centrifugation), total plasma sEV, L1CAM positive sEV, SN sEV (supernatant of L1CAM beads incubated with plasma sEV preparations after centrifugation), EV depleted plasma (after SEC preparation of total plasma EVs), plasma total, IgG

- 1 bead immuno-isolation of total plasma sEVs as negative control for L1CAM bead immuno-isolation).
- 2 Unprocessed WB: Suppl. Fig. 23.
- 3
- 4
- 5

1

## Supplementary Figure 5: DESCRIBE subcohort 1

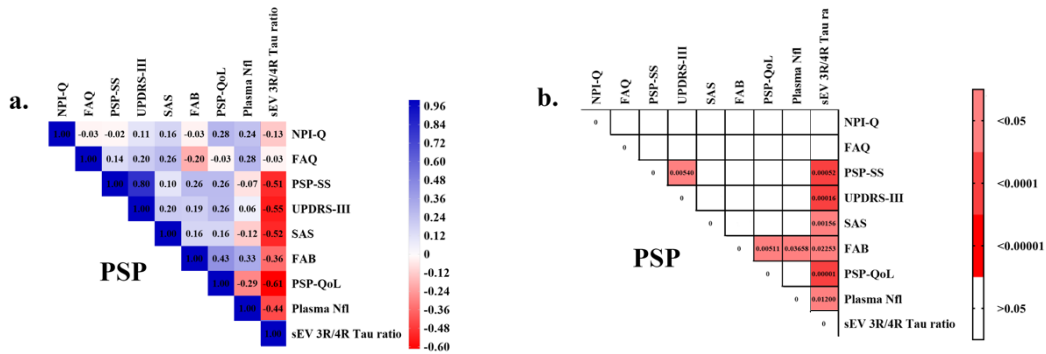

2

3 **Suppl. Figure 5. Correlation matrix** Results of two-sided Spearman correlations between different  
 4 clinical measures and sEV 3R/4R ratio, visualized by plotting strength of correlation ( $r$ ) as a heat map  
 5 along with  $p$  values (right). PSP: Neuropsychiatric Inventory Questionnaire (NPI-Q)<sup>9</sup>, Functional  
 6 Activities Questionnaire score (FAQ)<sup>10</sup>, PSP staging system (PSP-SS)<sup>11</sup>, MDS-Unified Parkinson's  
 7 Disability Rating Scale (MDS-UPDRS) Part III<sup>12</sup>, Starkstein Apathy Scale (SAS)<sup>13</sup>, PSP quality of life scale  
 8 (PSP-QoL)<sup>14</sup>.

9

10

11

1

## Supplementary Figure 6: DESCRIBE subcohort 1

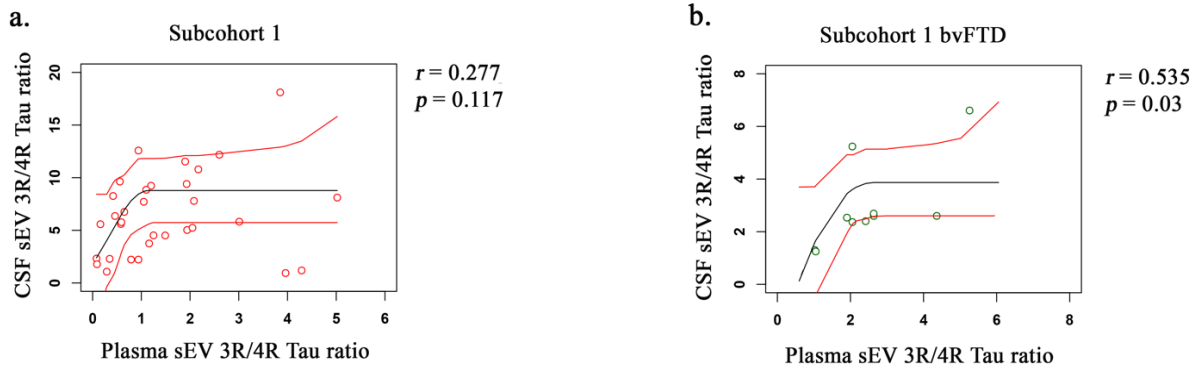

2  
3

4 **Suppl. Figure 6. CSF and plasma EV Tau ratio correlations** Two-sided Spearman correlation analysis  
5 of associations and monotonic regression splines between CSF sEV 3R/4R Tau ratio and plasma sEV  
6 3R/4R Tau ratio in **DESCRIBE subcohort 1** where CSF had been obtained in parallel to blood sampling  
7 (total number of samples  $n=141$ ). The majority of CSF sEV 4R Tau levels were below the assay's  
8 detection limit and EV 3R/4R Tau ratios could not be calculated (CSF sEV 3R Tau detectable cases  
9  $n=100$ , CSF sEV 4R Tau detectable cases  $n=34$ ; bvFTD number of total cases in subcohort 1  $n=42$ , CSF  
10 sEV 4R Tau detectable cases  $n=10$ ). **(a)** CSF to plasma sEV 3R/4R Tau correlation, all diagnostic groups  
11 ( $n=34$ ), **(b)** CSF to plasma sEV 3R/4R Tau correlation in the bvFTD group only ( $n=10$ ). No significant  
12 correlation was found between CSF and plasma sEV Tau ratios across all diagnostic groups of  
13 subcohort 1 in samples which had detectable CSF EV 4R Tau levels (sEV:  $r=0.277$ ,  $p=0.117$ ). In the  
14 bvFTD group. CSF sEV Tau ratios correlated significantly with the corresponding plasma sEV Tau  
15 ratios (sEV:  $r=0.535$ ,  $p=0.034$ ). CSF sEV 3R Tau levels correlated with plasma EV sEV 3R Tau ( $r=0.24$ ,  
16  $p=0.016$ ).

17

18

19

20

21

22

23

24

25

26

27

28

29

30

31

32

33

1  
2  
3

### Supplementary Figure 7: DESCRIBE subcohort 2

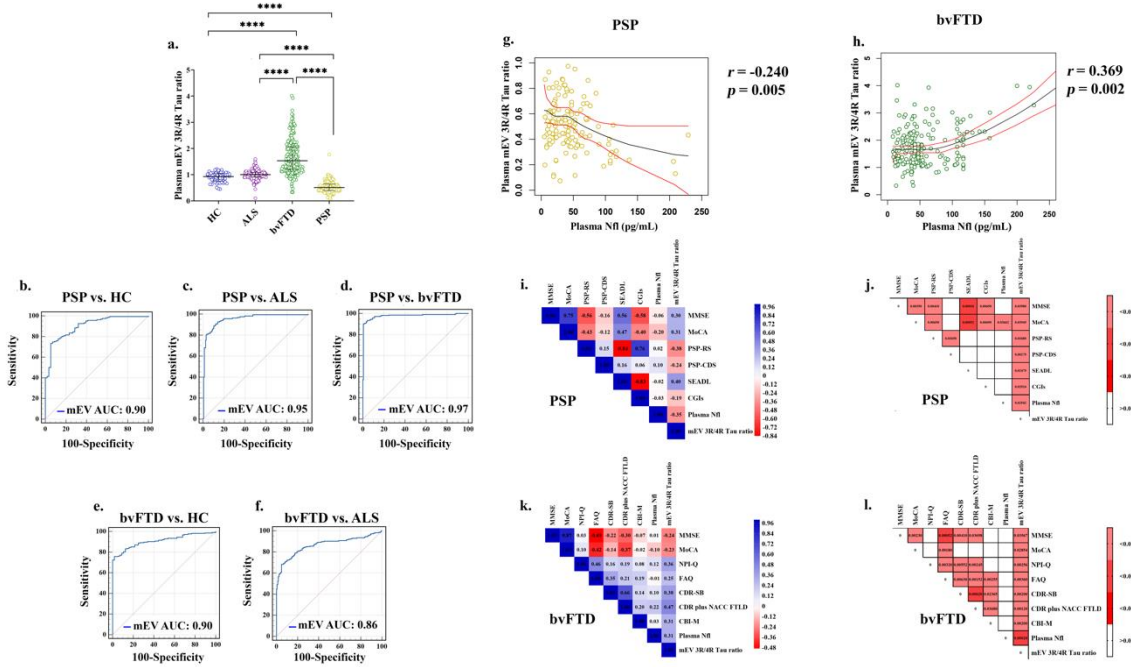

4  
5  
6  
7  
8  
9  
10  
11  
12  
13  
14  
15  
16  
17  
18  
19  
20  
21  
22  
23

**Suppl. Figure 7.** 3R/4R Tau ratio in plasma mEV in **DESCRIBE subcohort 2** (a) Biologically independent samples: HC n= 56, ALS n=165, bvFTD n= 179, PSP n=163. Horizontal lines: median and inter-quartile range (IQR). Kruskal-Wallis test with Dunn’s correction for multiple comparisons (HC vs. bvFTD  $p=0.0000052$ , HC vs. PSP  $p=0.0000012$ , ALS vs. bvFTD  $p=0.0000097$ , ALS vs. PSP  $p=0.0000056$ , bvFTD vs. PSP  $p=0.0000041$ ; \*\*\*\*  $p<0.00001$ ). (b-f) Receiver Operating Characteristic (ROC) curve for mEV 3R/4R Tau ratio: (b) PSP vs. HC (c) PSP vs. ALS (d) PSP vs. bvFTD (e) bvFTD vs. HC (f) bvFTD vs. ALS (g-h) Two-sided Spearman correlation analysis and monotonic regression splines were performed between mEV 3R/4R ratio and plasma NfL levels within (g) PSP and (h) bvFTD diagnostic groups. (i-l) Correlation matrix depicting results of two-sided Spearman correlations, visualized by plotting strength of correlation ( $r$ ) as a heat map along with  $p$  values (right). (i, j) PSP and (k, l) bvFTD. PSP: Mini Mental State Examination (MMSE)<sup>15</sup>, Montreal Cognitive Assessment (MoCA)<sup>16</sup>, PSP rating scale (PSP-RS)<sup>17</sup>, PSP-clinical deficits scale (PSP-CDS)<sup>18</sup>, Schwab and England disability scale (SEADL)<sup>19</sup>, the Clinical Global Impression Severity Scale (CGI-s)<sup>20</sup>; bvFTD: MMSE, MoCa, Neuropsychiatric Inventory Questionnaire (NPI-Q)<sup>9</sup>, Functional Activities Questionnaire score (FAQ)<sup>10</sup>, Clinical Dementia Rating-Sum of Boxes score (CDR-SB)<sup>21</sup>, CDR plus NACC FTLD, previously termed CDR-SB FTD<sup>22</sup>, modified version of the Cambridge Behavior Inventory-Revised Version<sup>23</sup> (CBI-M).

## Supplementary Figure 8: DESCRIBE subcohort 2

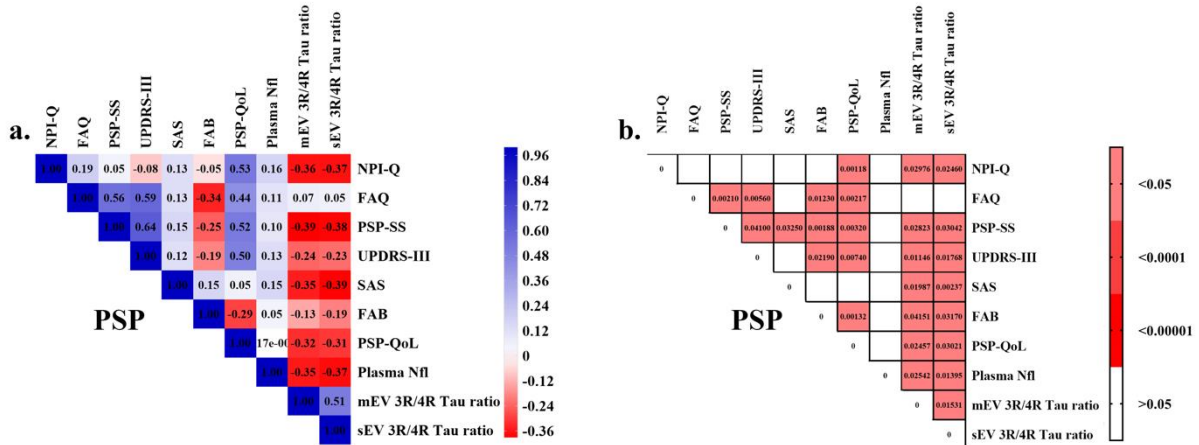

**Suppl. Figure 8. Correlation matrix.** Results of two-sided Spearman correlations between different clinical and neuropsychological measures of disease severity and sEV and mEV 3R/4R Tau ratio, visualized by plotting strength of correlation ( $r$ ) as a heat map along with  $p$  values (right).

## Supplementary Figure 9: DESCRIBE subcohort 2

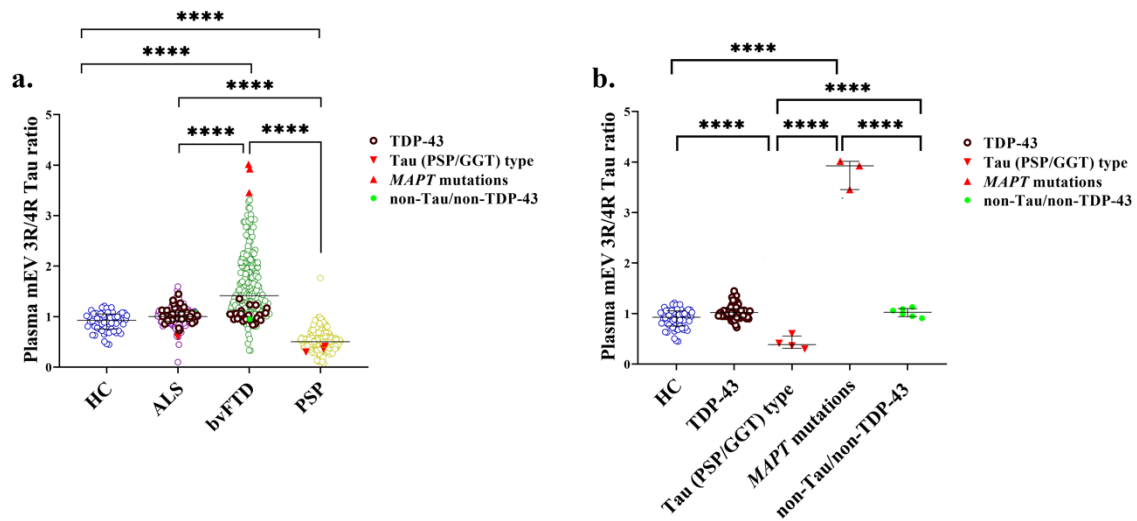

3  
4 **Suppl. Figure 9. Plasma mEV 3R/4R Tau ratio in genetic (n=37) or autopsy confirmed (n=31) cases**  
5 **from DESCRIBE subcohort 2** Total number of individual cases n= 63, 5 of these cases had both,  
6 genetic and neuropathological diagnosis. **TDP-43 pathology group:** bvFTD [*C9orf72* (n=13), *GRN*  
7 (n=4), *VCP* (n=4), *TBK1* (n=2)]; ALS [*C9orf72* (n=5)]; neuropathological diagnosis [FTLD-TDP (n=1)];  
8 ALS-TDP (n=17), ALS-FTLD TDP (n=6)]. **PSP/GGT-type Tau pathology group:** neuropathological  
9 diagnosis [(PSP-Tau (n=3); FTLD-Tau GGT type (n=1)]. **bvFTD MAPT mutations:** [*MAPT P301L* (n=1),  
10 *MAPT P364S* (n=1), *MAPT IVS10+16C>T* (n=1)]. **Non-Tau/non-TDP-43 pathology group:** ALS [*SOD-1*  
11 (n=2); *FUS* (n=2); *CHCHD10* (n=1)]; bvFTD [*CHCHD10* (n=1)]. **(a)** mEV 3R/4R Tau ratios in the different  
12 pathology groups, stratified by clinical diagnosis (HC vs. bvFTD  $p=0.0000052$ , HC vs. PSP  $p=0.0000012$ ,  
13 ALS vs. bvFTD  $p=0.0000097$ , ALS vs. PSP  $p=0.0000056$ , bvFTD vs. PSP  $p=0.0000041$ ; \*\*\*\* $p<0.00001$ ).  
14 **(b)** mEV 3R/4R Tau ratios of the different pathology groups, independent from clinical diagnostic  
15 group. The long horizontal line represents the median and the short horizontal lines represent the  
16 inter-quartile range (IQR). Kruskal-Wallis test with Dunn's correction for multiple comparisons. HC vs.  
17 Tau (PSP/GGT) type  $p=0.0000058$ , HC vs. *MAPT* mutations  $p=0.0000069$ , Tau (PSP/GGT) type vs.  
18 *MAPT* mutations  $p=0.0000084$ , Tau(PSP/GGT) type vs. non-Tau/non-TDP-43  $p=0.0000099$ , *MAPT*  
19 mutations vs. non-Tau/non-TDP-43  $p=0.0000032$ ; \*\*\*\* $p<0.00001$ ). mEV 3R/4R Tau ratios in the  
20 different groups. HC: median mEV 0.90, IQR[0.75-1.05]; TDP-43 group: median mEV 1.03, IQR[0.93-  
21 1.09]; non-TDP-43/non-Tau group: median mEV 1.03, IQR[0.95-1.11]. Neuropathologically confirmed  
22 PSP/GGT-type 4R Tau pathology group: median mEV 0.41, IQR[0.31-0.55]. Patients with Tau  
23 pathology in the bvFTD group (*MAPT* mutation carriers): median mEV 3.79, IQR[3.45-4.01].

24

25



1

## Supplementary Figure 10

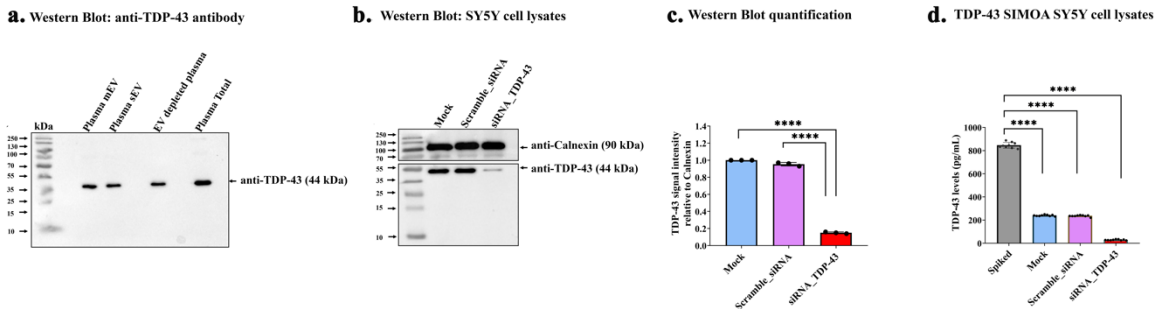

2

3 **Suppl. Figure 10. Presence of TDP-43 in plasma EVs (a)** Western blot of (lanes from left to right)  
 4 plasma mEVs, sEVs, EV-depleted plasma, and total plasma with an antibody directed against TDP-43.  
 5 **(b)** Western blot of SY5Y cell lysates (lanes from left to right) after mock transfection, scrambled  
 6 siRNA, and TDP-43 siRNA transfection. Upper panel probed with anti-Calnexin antibody as a loading  
 7 control, lower panel probed with anti-TDP-43 antibody (n= 3 independent experiments). **(c)** Western  
 8 blot quantification: TDP-43 signal (optical density) normalized to Calnexin. Mock, scrambled, and  
 9 TDP-43 siRNA transfected SY5Y cell lysates. (n= 3 independent experiments). Kruskal-Wallis test with  
 10 Dunn's correction for multiple comparisons. ns=non-significant, mock vs. TDP-43 siRNA  $p=0.0000063$ ,  
 11 scrambled vs. TDP-43 siRNA;  $p=0.0000033$ ; \*\*\*\*  $p<0.00001$ . **(d)** SIMOA assay quantification of SY5Y  
 12 cell lysates (from left to right): spiked with recombinant TDP-43, mock, scrambled, and TDP-43 siRNA  
 13 transfected. (n= 9 independent experiments). Kruskal-Wallis test with Dunn's correction for multiple  
 14 comparisons. ns=non-significant, TDP-43 spike vs. mock  $p=0.0000027$ , TDP-43 spike vs. scrambled  
 15 siRNA  $p=0.0000048$ , TDP-43 spike vs. scrambled siRNA  $p=0.0000015$ ; \*\*\*\*  $p<0.00001$ .  
 16

1

## Supplementary Figure 11: DESCRIBE subcohort 2

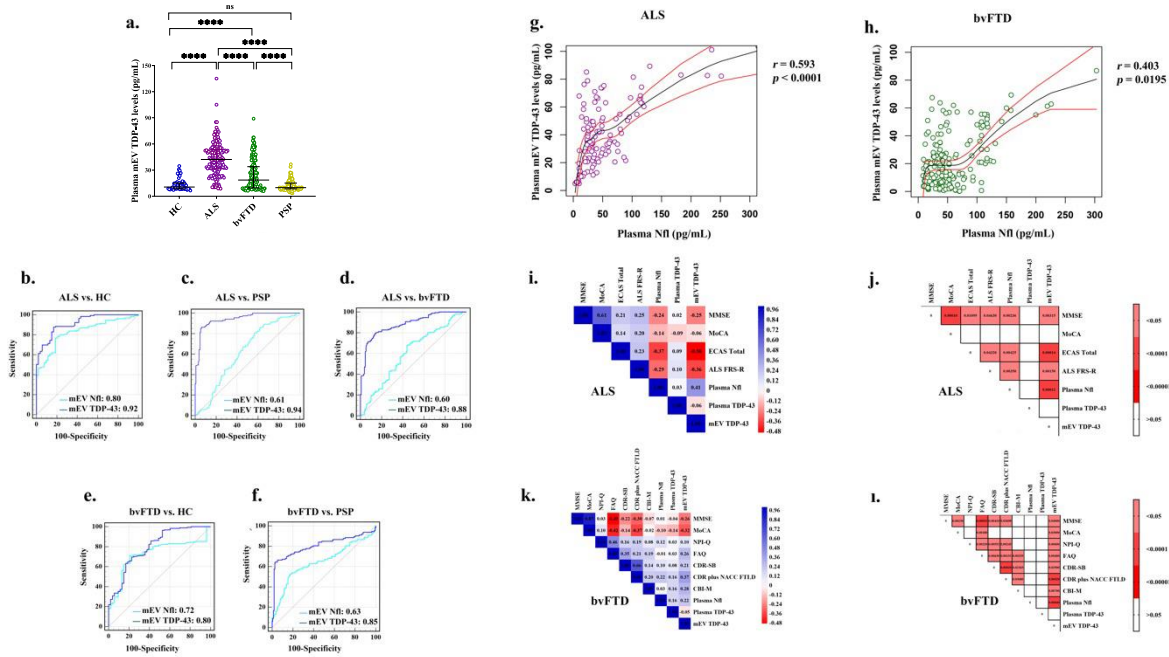

2

3 **Suppl. Figure 11. Plasma mEV TDP-43 levels in DESCRIBE subcohort 2.** Biologically independent  
 4 samples: HC  $n = 56$ , ALS  $n = 165$ , bvFTD  $n = 179$ , PSP  $n = 163$ . **(a)** Plasma mEV TDP-43 in the different  
 5 diagnostic groups. Horizontal lines: median and inter-quartile range (IQR). Kruskal-Wallis test with  
 6 Dunn's correction for multiple comparisons (HC vs. ALS  $p = 0.000028$ , HC vs. bvFTD  $p = 0.000054$ , ALS  
 7 vs. bvFTD  $p = 0.000043$ , ALS vs. PSP  $p = 0.000012$ , bvFTD vs. PSP  $p = 0.000093$ ; \*\*\*\*  $p < 0.00001$ ). **(b-f)**  
 8 Receiver Operating Characteristic (ROC) curve for mEV TDP-43 (red) and plasma NfL (blue): **(b)** ALS  
 9 vs. HC **(c)** ALS vs. PSP **(d)** ALS vs. bvFTD **(e)** bvFTD vs. HC **(f)** bvFTD vs. PSP. The long horizontal line  
 10 represents the median and the short horizontal lines represent the inter-quartile range (IQR).  
 11 Kruskal-Wallis test with Dunn's correction for multiple comparisons. \*\*\*\*  $p < 0.00001$ . **(g-h)** Two-  
 12 sided Spearman correlation analysis of associations between mEV 3R/4R ratio and plasma NfL levels  
 13 and monotonic regression splines within **(g)** ALS ( $p = 0.000016$ ) and **(h)** bvFTD diagnostic groups. **(i-l)**  
 14 Correlation matrix depicting results of Spearman correlations, visualized by plotting strength of  
 15 correlation ( $r$ ) as a heat map along with  $p$ -values (right). **(i, j)** ALS and **(k, l)** bvFTD.

16

17

18

19

20

21

22

23

24

25

1

## Supplementary Figure 12: DESCRIBE subcohort 2

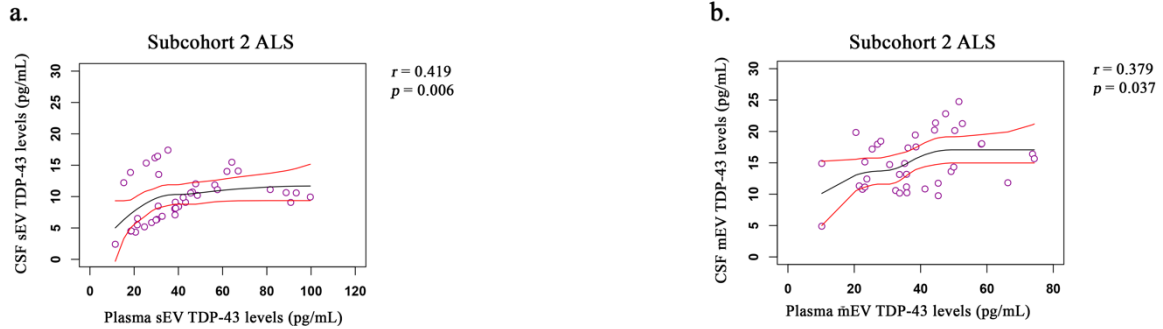

2

3 **Suppl. Figure 12. Correlation of plasma and CSF TDP-43 in DESCRIBE subcohort 2, ALS group.** EVs  
4 prepared from 1.5 ml of pooled AD patients CSF revealed TDP-43 levels around the LLOQ and below  
5 LLOQ when a CSF volume of 1 ml was used for EV preparation. In contrast, pooled ALS CSF samples  
6 showed higher CSF EV TDP-43 concentrations and allowed starting volumes down to 1 ml. We  
7 therefore focused on available and corresponding ALS group CSF samples from DESCRIBE subcohort  
8 2. Two-tailed Spearman correlation analysis of associations and monotonic regression splines  
9 between **(a)** CSF sEV TDP-43 and plasma sEV TDP-43 (n=30), **(b)** CSF mEV TDP-43 and plasma mEV  
10 TDP-43 (n=40). CSF volume for EV preparation: 1 ml. 75.6% (n=41) of the tested CSF samples had EV  
11 TDP-43 levels above the detection limit. n=41 biologically independent samples.

12

13

14

1

## Supplementary Figure 13: DESCRIBE subcohort 2

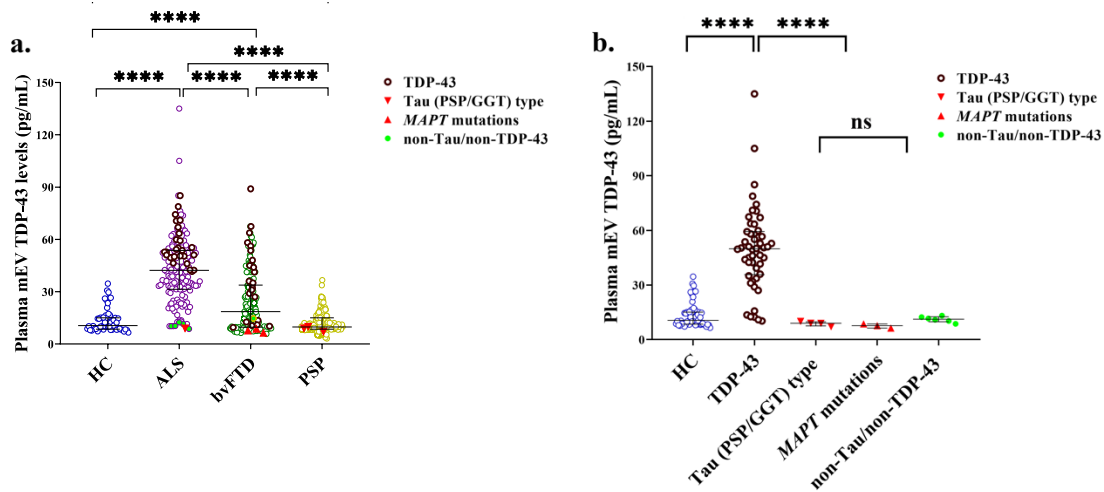

2

3 **Suppl. Figure 13. TDP-43 in plasma mEV in genetic (n=37) or autopsy confirmed (n=31) cases from**  
 4 **DESCRIBE subcohort 2** Total number of individual cases n= 63, 5 of these cases had both, genetic and  
 5 neuropathological diagnosis. **(a)** plasma mEV TDP-43 in the different pathology groups, stratified by  
 6 clinical diagnosis (HC vs. ALS  $p=0.0000028$ , HC vs. bvFTD  $p=0.0000054$ , ALS vs. bvFTD  $p=0.0000043$ ,  
 7 ALS vs. PSP  $p=0.0000012$ , bvFTD vs. PSP  $p=0.0000093$ ; \*\*\*\*  $p<0.00001$ ). **(b)** plasma mEV TDP-43  
 8 concentrations in the different pathology groups, independent from clinical diagnostic group. The  
 9 long horizontal line represents the median and the short horizontal lines represent the inter-quartile  
 10 range (IQR) (HC vs. TDP-43  $p=0.0000052$ , TDP-43 vs. Tau (PSP/GGT)  $p=0.0000091$ , TDP-43 vs. MAPT  
 11 mutations  $p=0.0000026$ , TDP-43 vs. non-Tau/non-TDP-43  $p=0.0000057$ ; \*\*\*\*  $p<0.00001$ ). Kruskal-  
 12 Wallis test with Dunn's correction for multiple comparisons. \*\*\*\*  $p<0.00001$ . **TDP-43 pathology**  
 13 **group:** bvFTD [*C9orf72* (n=13), *GRN* (n=4), *VCP* (n=4), *TBK1* (n=2)]; ALS [*C9orf72* (n=5)];  
 14 neuropathological diagnosis [FTLD-TDP (n=1)]; ALS-TDP (n=17), ALS-FTLD TDP (n=6)]. **PSP/GGT-type**  
 15 **Tau pathology group:** neuropathological diagnosis [(PSP-Tau (n=3); FTLD-Tau GGT type (n=1)]. **bvFTD**  
 16 **MAPT mutations:** [*MAPT P301L* (n=1), *MAPT P364S* (n=1), *MAPT IVS10+16C>T* (n=1)]. **Non-Tau/non-**  
 17 **TDP-43 pathology group:** ALS [*SOD-1* (n=2); *FUS* (n=2); *CHCHD10* (n=1)]; bvFTD [*CHCHD10* (n=1)].  
 18 Median plasma mEV TDP-43 in the different groups. TDP-43 pathology group: 48.74 pg/ml,  
 19 IQR[34.32-58.70]; PSP/GGT-type Tau pathology group: 2.73 pg/ml, IQR[2.53-3.72]; genetic MAPT  
 20 group: 2.30 pg/ml, IQR[2.23-2.35]; non-TDP-43/non-Tau pathology group: 10.74 pg/ml, IQR[9.45-  
 21 12.36].  
 22

1  
2

## Supplementary Figure 14: DESCRIBE subcohort 2

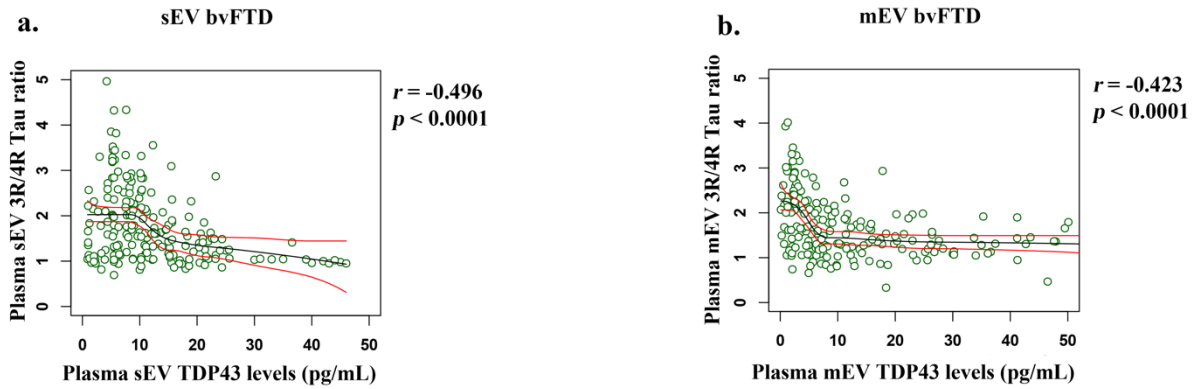

3  
4  
5  
6  
7  
8  
9  
10  
11

**Suppl. Figure 14. Correlation analysis of plasma EV Tau ratio and TDP-43 in DESCRIBE subcohort 2, bvFTD group (a)** Two-sided Spearman correlation analysis and monotonic regression splines of associations between plasma sEV 3R/4R Tau ratio and plasma sEV TDP-43 levels ( $p=0.000019$ ). **(b)** Two-sided Spearman correlation analysis and monotonic regression splines of associations between plasma mEV 3R/4R Tau ratio and plasma mEV TDP-43 levels ( $p=0.000049$ );  $n=179$  biologically independent samples.

## Supplementary Figure 15: DESCRIBE subcohort 2

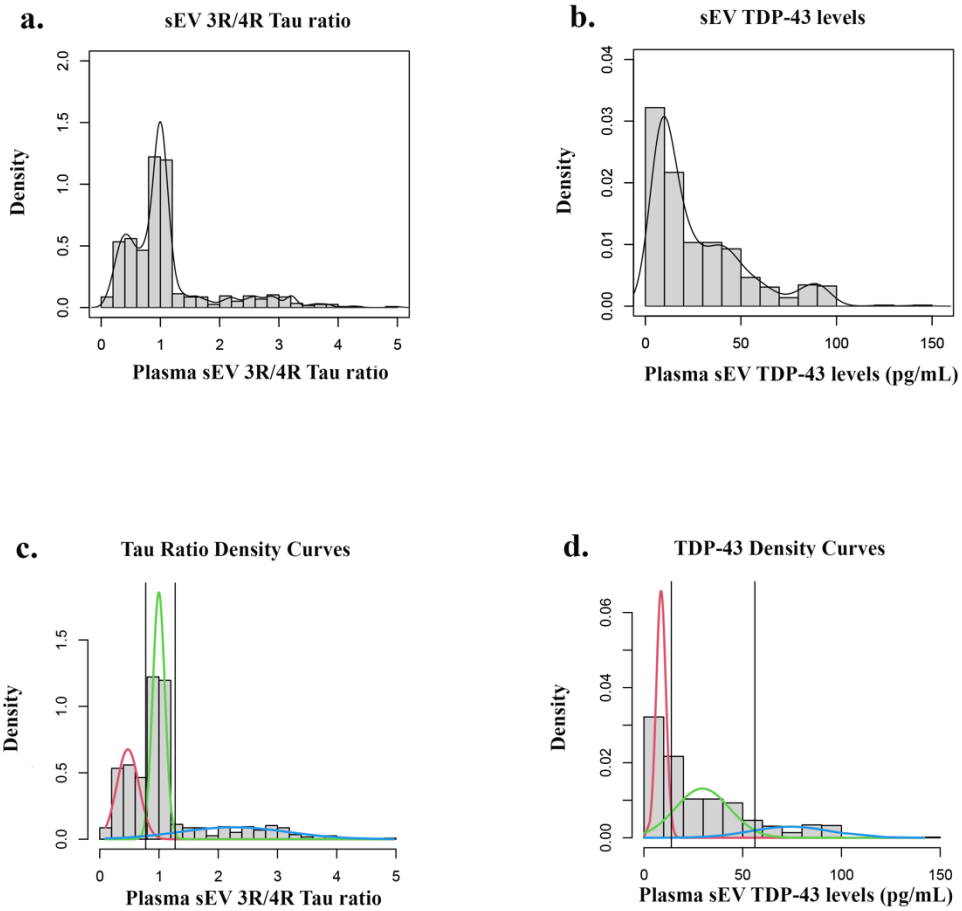

**Suppl. Figure 15. Definition of cut-offs by Gaussian mixture modelling. (a,b)** Distributions of raw data, plasma sEV 3R/4R Tau, and plasma sEV TDP-43 in **DESCRIBE subcohort 2**. **(c,d)** Data with an estimated mixture of normals. Vertical lines indicate the intersections of the normal mixture components which were defined as cut-off values.

2  
3  
4  
5  
6  
7  
8  
9  
10  
11  
12  
13  
14  
15  
16  
17  
18  
19  
20  
21  
22  
23  
24  
25

1  
2

## Supplementary Figure 16: Sant Pau cohort

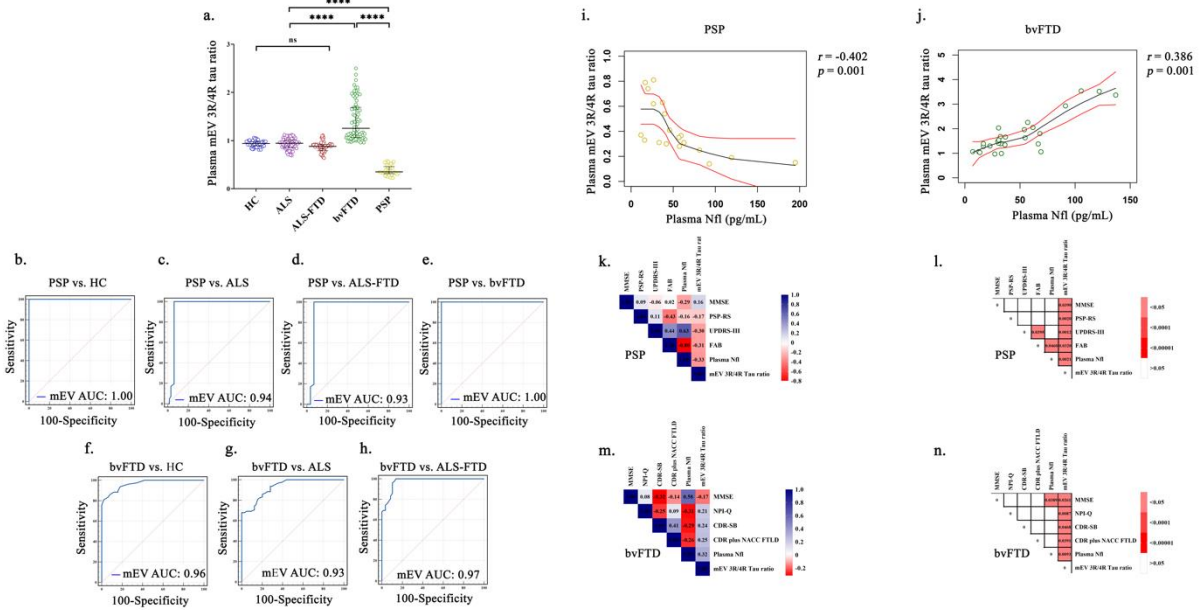

3  
4

**Suppl. Figure 16. Plasma mEV 3R/4R Tau ratios in the Sant Pau cohort (a)** Biologically independent samples: HC n= 50, ALS n=65, ALS-FTD n=58, bvFTD n=50 (+23 mutation carriers), PSP n=41). The long horizontal line represents the median and the short horizontal lines represent the inter-quartile range (IQR). Kruskal-Wallis test with Dunn's correction for multiple comparisons (HC vs. bvFTD  $p=0.0000056$ , HC vs. PSP  $p=0.0000027$ , ALS vs. bvFTD  $p=0.0000067$ , ALS vs. PSP  $p=0.0000018$ , ALS-FTD vs. bvFTD  $p=0.0000061$ , ALS-FTD vs. PSP  $p=0.0000039$ , bvFTD vs. PSP  $p=0.0000057$ ; \*\*\*\*  $p<0.00001$ ). **(b-h)** Receiver Operating Characteristic (ROC) curve for plasma mEV 3R/4R Tau ratio **(b)** PSP vs. HC **(c)** PSP vs. ALS **(d)** PSP vs. ALS-FTD **(e)** PSP vs. bvFTD **(f)** bvFTD vs. HC **(g)** bvFTD vs. ALS **(h)** bvFTD vs. ALS-FTD. **(i-j)** Two-sided Spearman correlation analysis of associations and monotonic regression splines between plasma mEV 3R/4R Tau ratios and plasma Nfl levels within **(i)** PSP and **(j)** bvFTD diagnostic groups. **(k-n)** Correlation matrix depicting results of two-sided Spearman correlations, visualized by plotting strength of correlation ( $r$ ) as a heat map (left) along with  $p$ -values (right). **(k, l)** PSP and **(m, n)** bvFTD.

18

19

20

## Supplementary Figure 17: Sant Pau cohort

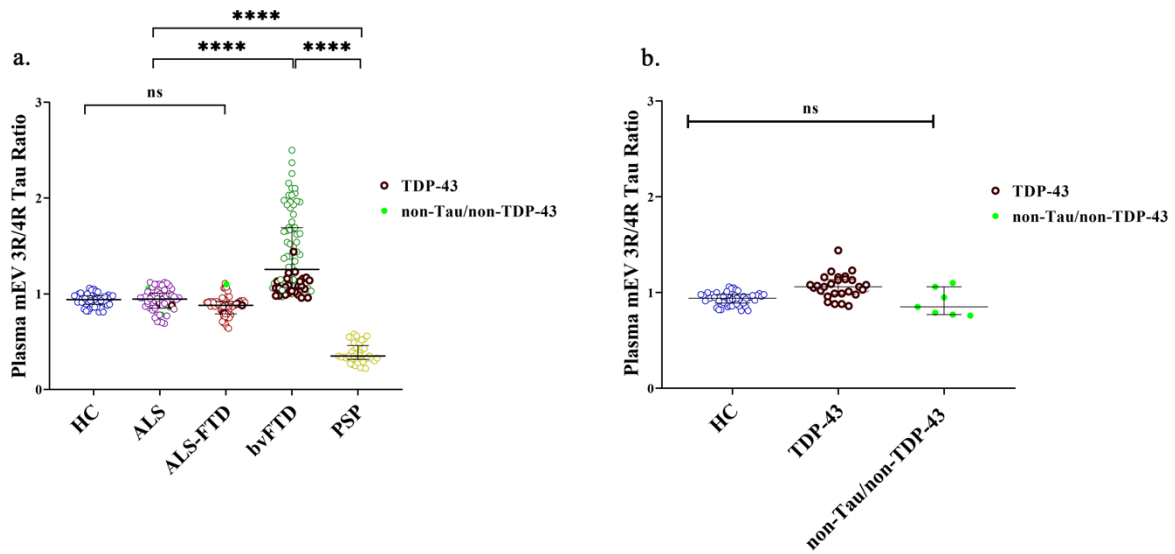

3  
4 **Suppl. Figure 17. Sant Pau cohort, plasma mEV 3R/4R Tau ratios in genetic cases.** TDP-43 pathology  
5 (brown circles), non-Tau/non-TDP-43 pathology (filled green circles) (a) stratified by the different  
6 diagnostic groups (HC vs. bvFTD  $p=0.0000056$ , HC vs. PSP  $p=0.0000027$ , ALS vs. bvFTD  $p=0.0000067$ ,  
7 ALS vs. PSP  $p=0.0000018$ , ALS-FTD vs. bvFTD  $p=0.0000061$ , ALS-FTD vs. PSP  $p=0.0000039$ , bvFTD  
8 vs. PSP  $p=0.0000057$ ; \*\*\*\*  $p<0.00001$ ) (b) independent from diagnostic groups. The long horizontal  
9 line represents the median and the short horizontal lines represent the inter-quartile range (IQR).  
10 Kruskal-Wallis test with Dunn's correction for multiple comparisons (HC vs. TDP-43  $p=0.632$ , HC vs.  
11 non-Tau/non-TDP-43  $p=0.412$ , TDP-43 vs. non-Tau/non-TDP-43  $p=0.256$ ; n.s. not significant). **TDP-43**  
12 **pathology group:** bvFTD [*C9orf72* (n=12), *GRN* (n=6), *TARDP* (n=1), *VCP* (n=1), *TBK-1* (n=3)]; ALS  
13 [*C9orf72* (n=3)]; ALS-FTD [*C9orf72* (n=1)]. **Non-Tau/non-TDP-43 pathology group:** ALS [*SOD-1* (n=3);  
14 *FUS* (n=3)]; ALS-FTD [*SOD-1* (n=1)]. Plasma mEV 3R/4R Tau ratios. HC: median 0.94, IQR[0.81-  
15 1.06]; TDP-43 associated genetic cases group: median 1.03, IQR[0.86-1.44]; non-TDP-43/non-Tau  
16 associated genetic cases group: median 0.9, IQR[0.76-1.15]).

17

18

19

20

21

22

23

24

25

26

27

28

29

30

31

32



1  
2

### Supplementary Figure 18: Sant Pau cohort

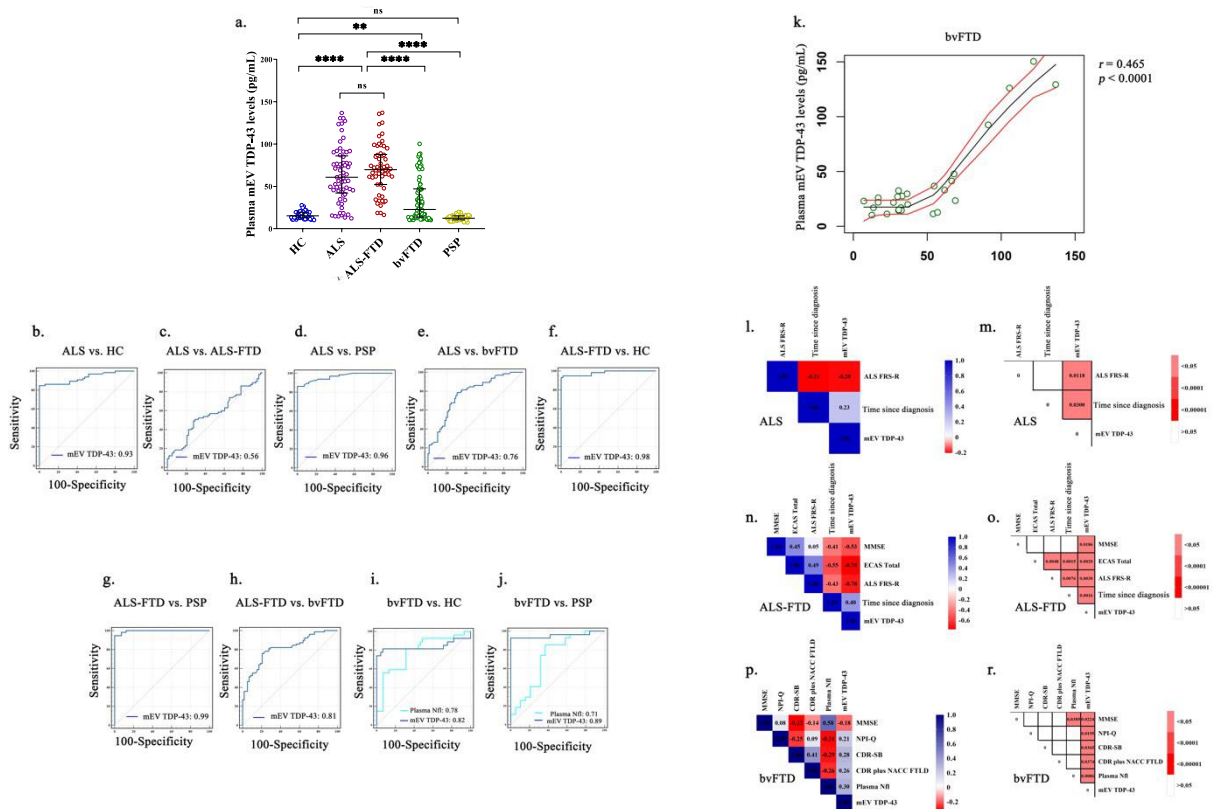

3  
4  
5

**Suppl. Figure 18. Plasma mEV TDP-43 levels in the different diagnostic groups of Sant Pau cohort.**

6  
7 (a) Biologically independent samples: HC n= 50, ALS n=65, ALS-FTD n=58, bvFTD n=50(+23  
8 mutations), PSP n=41). The long horizontal line represents the median and the short horizontal lines  
9 represent the inter-quartile range (IQR). Kruskal-Wallis test with Dunn's correction for multiple  
10 comparisons (HC vs. ALS  $p=0.0000014$ , HC vs. ALS-FTD  $p=0.0000033$ , ALS vs. bvFTD  $p=0.00059$ , HC vs.  
11 PSP  $p=0.763$ , ALS vs. bvFTD  $p=0.000005$ , ALS vs. PSP  $p=0.0000062$ , ALS-FTD vs. bvFTD  $p=0.0000053$ ,  
12 ALS-FTD vs. PSP  $p=0.0000042$ , bvFTD vs. PSP  $p=0.00054$ ; \*\* $p<0.001$ , \*\*\* $p<0.00001$ ). (b-j) Receiver  
13 Operating Characteristic (ROC) curve with AUC values for plasma mEV TDP-43: (b) ALS vs. HC (c) ALS  
14 vs. ALS-FTD (d) ALS vs. PSP (e) ALS vs. bvFTD (f) ALS-FTD vs. HC (g) ALS-FTD vs. PSP (h) ALS-FTD vs.  
15 bvFTD (i) bvFTD vs. HC (j) bvFTD vs. PSP. (k) Two-sided Spearman correlation analysis between  
16 plasma mEV TDP-43 and plasma Nfl levels and monotonic regression splines in patients with bvFTD  
17 ( $p=0.00007$ ). (l-r) Correlation matrix depicting results of two-sided Spearman correlations, visualized  
18 by plotting strength of correlation ( $r$ ) as a heat map (left) along with  $p$ -values (right). (l, m) ALS, (ALS  
19 Functional Rating scale (ALS-FRS) mEV:  $r=-0.200$ ,  $p=0.011$ ) and time since diagnosis/disease duration  
20 (mEV:  $r=0.233$ ,  $p=0.029$ ) (n, o) ALS-FTD (ALS Functional Rating scale (ALS-FRS) mEV:  $r=-0.699$ ,  
21  $p=0.003$ ) and time since diagnosis/disease duration (mEV:  $r=0.404$ ,  $p=0.001$ ); MMSE (mEV:  $r=-0.533$ ,  
22  $p=0.017$ ) and (p, r) bvFTD.

23  
24  
25  
26  
27

1  
2  
3

### Supplementary Figure 19: Sant Pau cohort

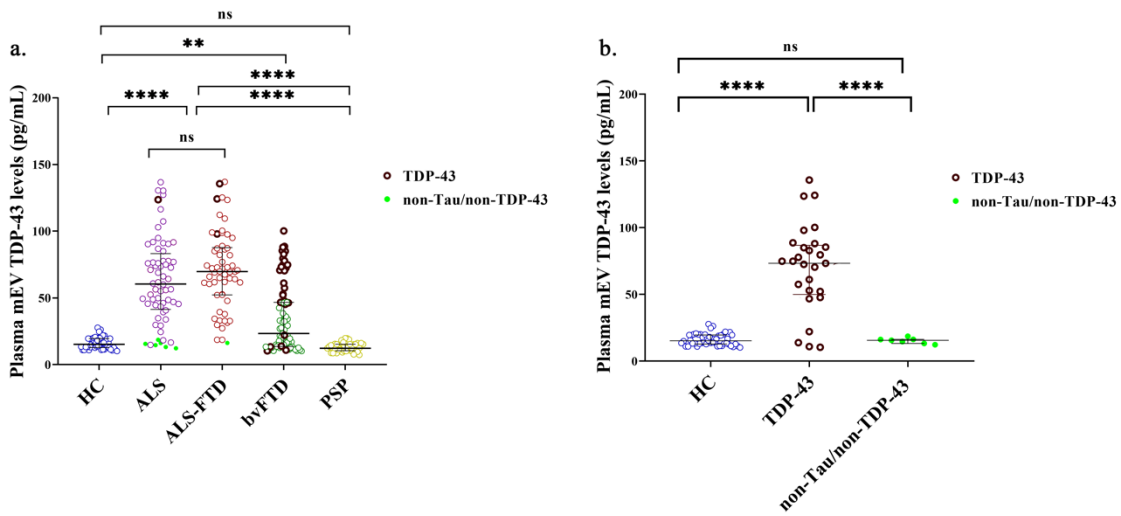

4  
5  
6  
7  
8  
9  
10  
11  
12  
13  
14  
15  
16  
17  
18  
19

**Suppl. Figure 19. Plasma mEV TDP-43 levels in genetic cases of Sant Pau cohort.** Cases associated with TDP-43 pathology (brown circles) or non-Tau/non-TDP-43 pathology (filled green circles) **(a)** stratified by the different diagnostic groups (HC vs. ALS  $p=0.0000014$ , HC vs. ALS-FTD  $p=0.0000033$ , ALS vs. bvFTD  $p=0.00059$ , HC vs. PSP  $p=0.763$ , ALS vs. bvFTD  $p=0.000005$ , ALS vs. PSP  $p=0.0000062$ , ALS-FTD vs. bvFTD  $p=0.0000053$ , ALS-FTD vs. PSP  $p=0.0000042$ , bvFTD vs. PSP  $p=0.00054$ ; \*\*  $p < 0.001$ , \*\*\*\*  $p < 0.00001$ ). **(b)** independent from diagnostic groups. The long horizontal line represents the median and the short horizontal lines represent the inter-quartile range (IQR). Kruskal-Wallis test with Dunn's correction for multiple comparisons (HC vs. TDP-43  $p=0.0000063$ , HC vs. non-Tau/non-TDP-43  $p=0.541$ , TDP-43 vs. non-Tau/non-TDP-43  $p=0.0000051$ ; \*\*  $p < 0.001$ , \*\*\*  $p < 0.0001$ , \*\*\*\*  $p < 0.00001$ ); n.s. not significant. **TDP-43 pathology group:** bvFTD [*C9orf72* (n=12), *GRN* (n=6), *TARDP* (n=1), *VCP* (n=1), *TBK-1* (n=3)]; ALS [*C9orf72* (n=3)]; ALS-FTD [*C9orf72* (n=1)]. **Non-Tau/non-TDP-43 pathology group:** ALS [*SOD-1* (n=3); *FUS* (n=3)]; ALS-FTD [*SOD-1* (n=1)]. Plasma mEV TDP-43 levels. TDP-43 pathology group: median mEV: 72.16 pg/ml, IQR[10.35-135.6]), non-Tau/non-TDP-43 group: median mEV: 15.17 pg/ml, IQR[12.30-18.63]), HC: median mEV: 15.20 pg/ml, IQR[10.23-27.73].

20  
21  
22  
23  
24  
25  
26  
27  
28  
29  
30  
31

1  
2  
3  
4

### Supplementary Figure 20: Sant Pau cohort

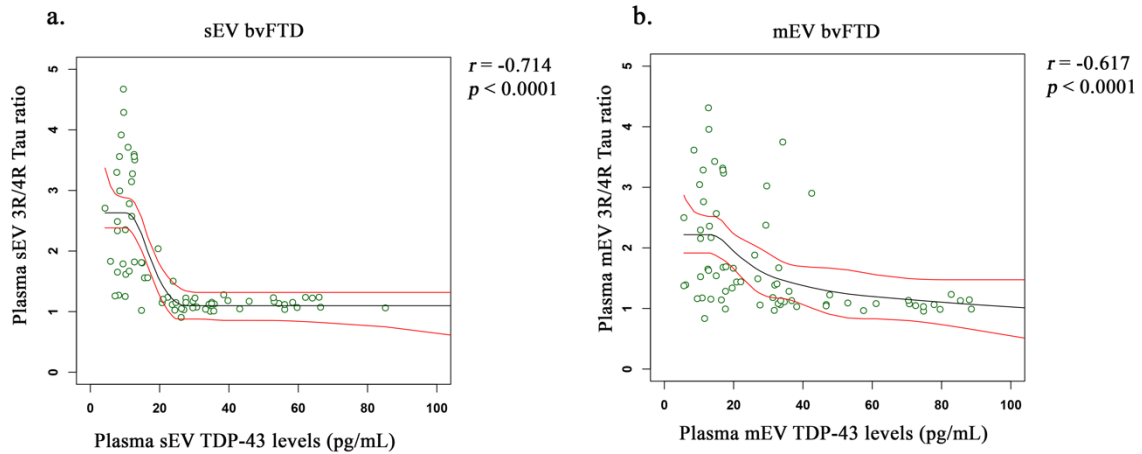

5  
6  
7  
8  
9  
10  
11  
12  
13  
14  
15  
16  
17  
18  
19  
20  
21  
22  
23  
24  
25  
26  
27  
28  
29  
30  
31  
32

**Suppl. Figure 20. Correlation analysis of plasma EV Tau ratio and TDP-43 in the Sant Pau cohort bvFTD group (sporadic and genetic cases) (a) Two-sided Spearman correlation analysis and monotonic regression splines of associations between plasma sEV 3R/4R Tau ratio and plasma sEV TDP-43 levels ( $p=0.000021$ ). (b) Two-sided Spearman correlation analysis and monotonic regression splines of associations between plasma mEV 3R/4R Tau ratio and plasma mEV TDP-43 levels ( $p=0.000036$ );  $n=73$  biologically independent samples.**

1  
2  
3  
4

### Supplementary Figure 21: Sant Pau cohort

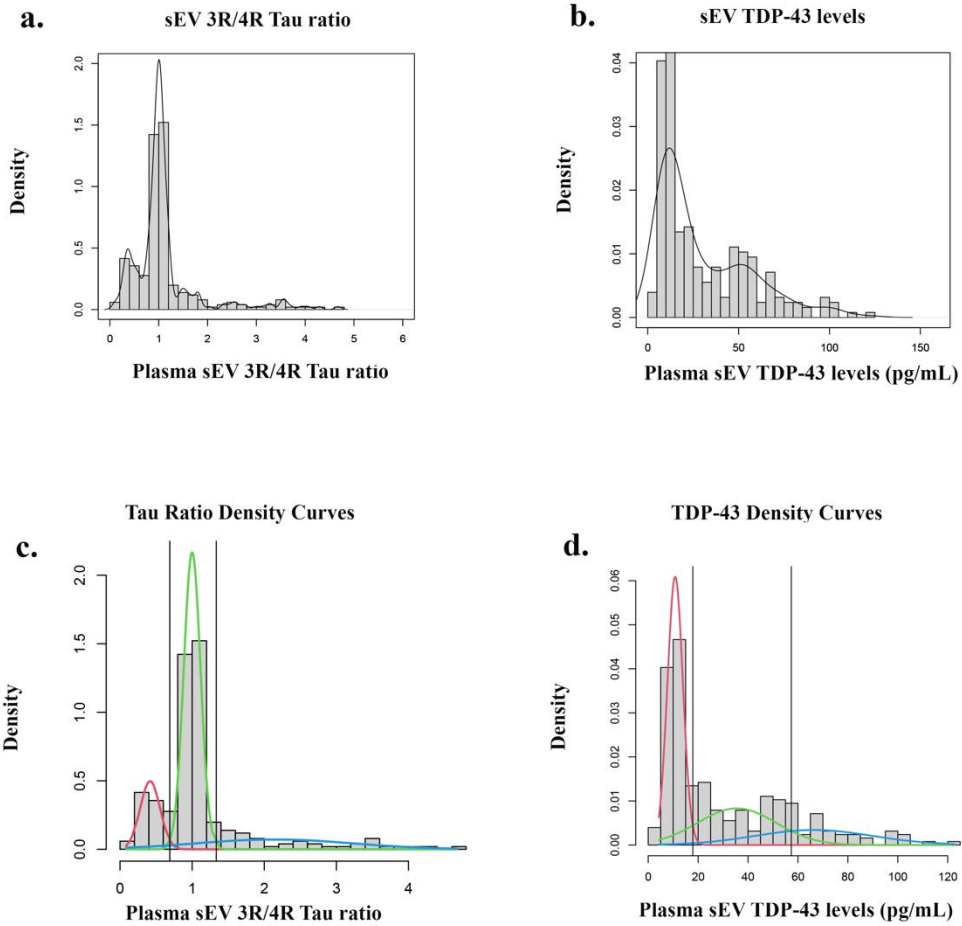

5  
6  
7  
8  
9  
10  
11  
12  
13  
14  
15  
16  
17  
18  
19  
20  
21  
22

**Suppl. Figure 21. Determination of cut-off values in the Sant Pau cohort (a,b)** distributions of raw data, **(a)** plasma sEV 3R/4R Tau ratio, and **(b)** plasma sEV TDP-43. **(c,d)** data with an estimated mixture of normal. **(c)** sEV Tau ratio, **(d)** sEV TDP-43. Vertical lines indicate the intersections of the normal mixture components which were defined as cut-off values. Distribution of sEV Tau ratios and TDP-43 was best approximated by three normal Gaussian distributions. Plasma sEV 3R/4R Tau ratio:  $p=0.001$ ; sEV TDP-43:  $p=0.001$  compared to one (plasma sEV 3R/4R Tau ratio:  $p=0.001$ ; sEV TDP-43:  $p=0.01$ ), two (plasma sEV 3R/4R Tau ratio:  $p=0.001$ ; sEV TDP-43:  $p=0.01$ ) or four Gaussian distributions (plasma sEV 3R/4R Tau ratio:  $p=0.1$ ; sEV TDP-43:  $p=0.1$ ).

1  
2  
3  
4  
5  
6

### Supplementary Figure 22

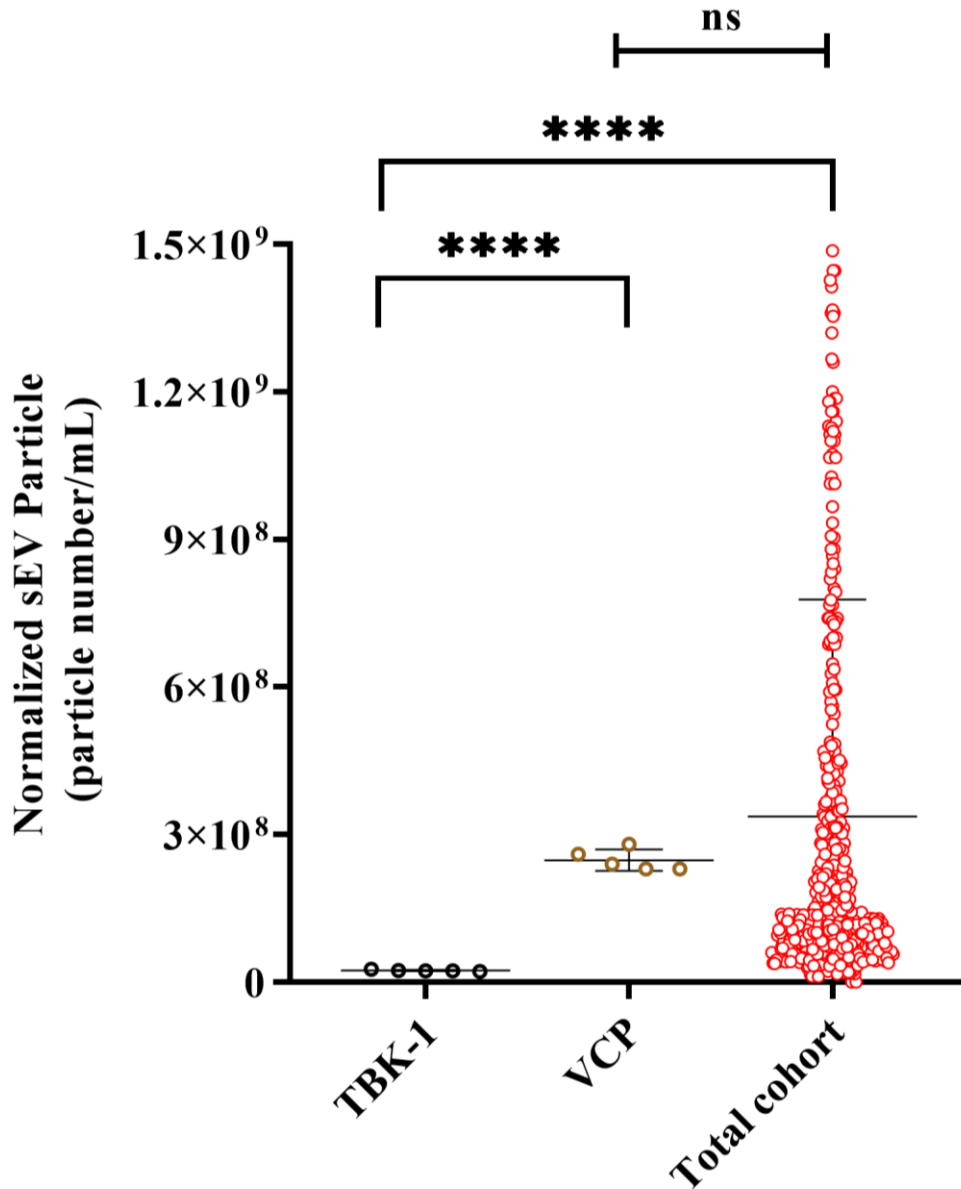

7  
8  
9  
10  
11  
12  
13  
14  
15

**Suppl. Fig. 22. Plasma sEV particle concentrations in *TBK-1* and *VCP* mutation carriers.** Plasma sEV concentrations are given as particle numbers/mL in *TBK-1* mutation carriers (black), *VCP* mutation carriers (brown) and all other samples (red). Data were normalized and pooled from DESCRIBE subcohort 2 and Sant Pau cohort. Of note, *VCP* mutation carriers showed plasma EV concentrations which were comparable to the cohorts' mean value. (*TBK-1*, n=5 in DESCRIBE subcohort 2 and Sant Pau cohort) and *VCP* (n=5 in DESCRIBE subcohort 2 and Sant Pau cohort). Total cohort: n= 850 biologically independent samples, sEV particle numbers of DESCRIBE subcohort 2 (n=563) and Sant Pau cohort (n=287). Kruskal-Wallis test followed by Dunn's correction for multiple comparisons. Data

1 are presented as mean +/- SEM. n.s: non-significant; *TBK-1* vs. *VCP*  $p=0.0000085$ , *TBK-1* vs. total  
2 cohort  $p=0.0000065$ , *VCP* vs. total cohort  $p = 0.733$ , \*\*\*\* $p < 0.00001$ .

### Supplementary Figure 23: Sant Pau cohort

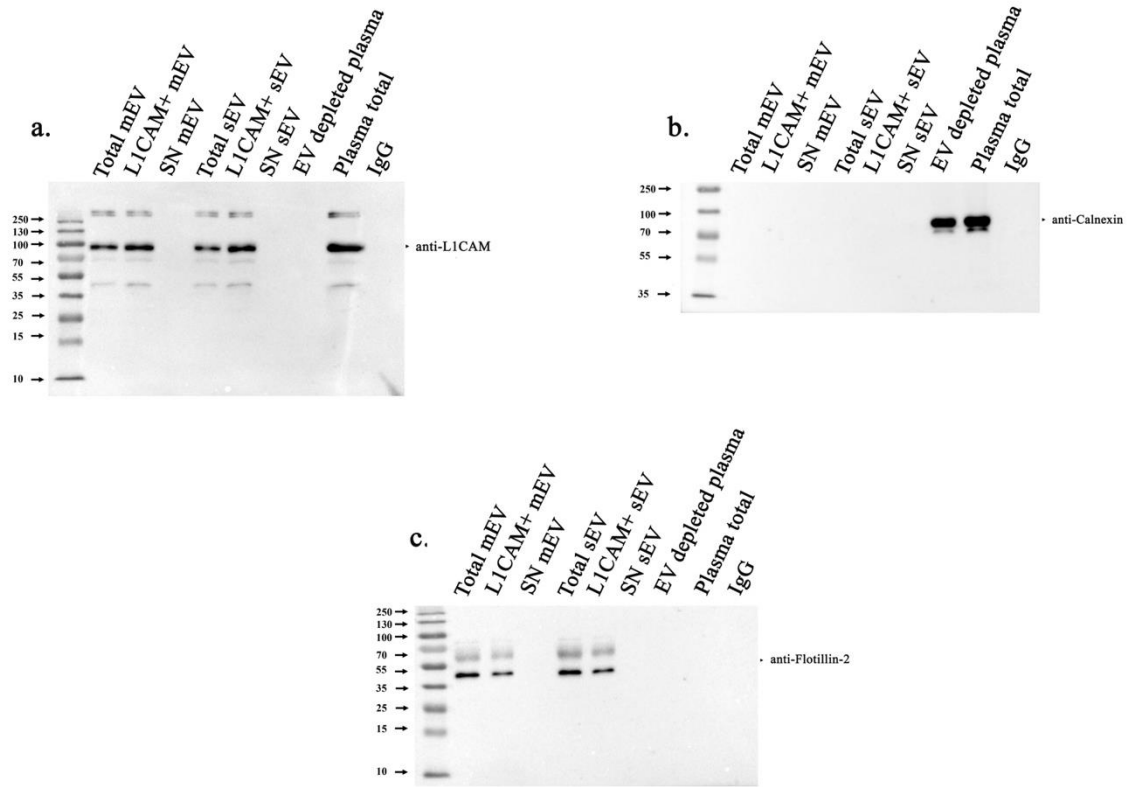

8  
9 **Suppl. Fig. 23. Uncropped Western Blots from Suppl. Fig. 4 a. (a) anti-L1CAM, (b) anti-Calnexin, (c)**  
10 **anti-Flotillin-2.**  
11
