# Supplementary material for: Plasma extracellular vesicle tau and TDP-43 as diagnostic biomarkers in FTD and ALS
Source: PubMed Central journal article supplement (PMC11186765; doi:10.1038/s41591-024-02937-4), 2024-06-18
Supplement: 41591_2024_2937_MOESM3_ESM.pdf [file 41591_2024_2937_MOESM3_ESM.pdf]

**Supplementary Table 1: 3R-4R Tau and TDP-43 assay validation parameters in plasma sEV and mEV**

| <b>3R and 4R Tau Assay Validation</b> |                   |                   |                   |                   | <b>TDP-43 Assay Validation</b> |                   |
|---------------------------------------|-------------------|-------------------|-------------------|-------------------|--------------------------------|-------------------|
| <b>Parameters</b>                     | <b>sEV 3R Tau</b> | <b>mEV 3R Tau</b> | <b>sEV 4R Tau</b> | <b>mEV 4R Tau</b> | <b>sEV TDP-43</b>              | <b>mEV TDP-43</b> |
| LLOQ (conc) pg/mL                     | 102.85            | 119.08            | 122.54            | 132.89            | 8.56                           | 7.78              |
| Avg % Linearity                       | 101.30            | 103.30            | 109.03            | 100.32            | 103.65                         | 111.02            |
| Mean % Recovery                       | 101.24            | 95.69             | 99.84             | 96.25             | 97.95                          | 104.40            |
| Avg % Parallelism                     | 110.18            | 112.71            | 106.55            | 104.08            | 99.38                          | 109.64            |
| CV (%) for intra-assay precision      | 6.59              | 6.54              | 3.38              | 3.21              | 4.78                           | 5.32              |
| CV (%) for inter-assay precision      | 7.95              | 7.63              | 4.54              | 4.39              | 5.21                           | 6.60              |

**Supplementary Table 2: Two-sided Spearman correlation between EV 3R/4R Tau ratio, age, sex and disease duration in DESCRIBE subcohort 1**

| Parameters       | Spearman $r$ values | $p$ values          |
|------------------|---------------------|---------------------|
|                  | sEV 3R/4R Tau ratio | sEV 3R/4R Tau ratio |
| Age              | 0.089               | 0.185               |
| Sex              | 0.063               | 0.123               |
| Disease duration | 0.056               | 0.147               |



| <b>Subcohort 1</b>     | AUC  | SE <sup>a</sup> | 95% CI <sup>b</sup> | <i>p</i> value | <b>Subcohort 2</b>                | AUC  | SE <sup>a</sup> | 95% CI <sup>b</sup> | <i>p</i> value |
|------------------------|------|-----------------|---------------------|----------------|-----------------------------------|------|-----------------|---------------------|----------------|
| <b>bvFTD vs. AD</b>    |      |                 |                     |                |                                   |      |                 |                     |                |
| sEV 3R/4R Tau Ratio    | 0.90 | 0.001           | 0.896 to 0.995      | 0.000033       |                                   |      |                 |                     |                |
| <b>bvFTD vs. svPPA</b> |      |                 |                     |                |                                   |      |                 |                     |                |
| sEV 3R/4R Tau Ratio    | 0.95 | 0.000           | 0.901 to 0.975      | 0.000023       |                                   |      |                 |                     |                |
|                        |      |                 |                     |                | <b>ALS vs HC</b>                  |      |                 |                     |                |
|                        |      |                 |                     |                | sEV TDP-43 (pg/mL)                | 0.99 | 0.003           | 0.972 to 1.000      | 0.000022       |
|                        |      |                 |                     |                | mEV TDP-43 (pg/mL)                | 0.92 | 0.020           | 0.866 to 0.952      | 0.00004        |
|                        |      |                 |                     |                | Plasma Nfl (pg/mL)                | 0.80 | 0.030           | 0.766 to 0.880      | 0.0157         |
|                        |      |                 |                     |                | sEV and Plasma Nfl AUC comparison |      | 0.032           | 0.107 to 0.228      | 0.000035       |
|                        |      |                 |                     |                | mEV and Plasma Nfl AUC comparison |      | 0.041           | 0.126 to 0.232      | 0.000051       |
|                        |      |                 |                     |                | <b>ALS vs. PSP</b>                |      |                 |                     |                |
|                        |      |                 |                     |                | sEV TDP-43 (pg/mL)                | 0.99 | 0.003           | 0.980 to 1.000      | 0.000055       |
|                        |      |                 |                     |                | mEV TDP-43 (pg/mL)                | 0.94 | 0.013           | 0.909 to 0.967      | 0.00002        |
|                        |      |                 |                     |                | Plasma Nfl (pg/mL)                | 0.61 | 0.034           | 0.557 to 0.673      | 0.368          |
|                        |      |                 |                     |                | sEV and Plasma Nfl AUC comparison |      | 0.034           | 0.312 to 0.447      | 0.00002        |
|                        |      |                 |                     |                | mEV and Plasma Nfl AUC comparison |      | 0.036           | 0.254 to 0.398      | 0.00005        |
|                        |      |                 |                     |                | <b>ALS vs. bvFTD</b>              |      |                 |                     |                |
|                        |      |                 |                     |                | sEV TDP-43 (pg/mL)                | 0.91 | 0.016           | 0.878 to 0.943      | 0.000043       |
|                        |      |                 |                     |                | mEV TDP-43 (pg/mL)                | 0.88 | 0.018           | 0.841 to 0.916      | 0.000085       |
|                        |      |                 |                     |                | Plasma Nfl (pg/mL)                | 0.60 | 0.032           | 0.550 to 0.661      | 0.268          |
|                        |      |                 |                     |                | sEV and Plasma Nfl AUC comparison |      | 0.036           | 0.237 to 0.378      | 0.00009        |

| <b>Subcohort 2</b>                |      |                 |                     |                |
|-----------------------------------|------|-----------------|---------------------|----------------|
|                                   | AUC  | SE <sup>a</sup> | 95% CI <sup>b</sup> | <i>p</i> value |
| <b>ALS vs. bvFTD</b>              |      |                 |                     |                |
| mEV and Plasma Nfl AUC comparison |      | 0.023           | 0.202 to 0.349      | 0.00004        |
| <b>bvFTD vs. HC</b>               |      |                 |                     |                |
| sEV TDP-43 (pg/mL)                | 0.85 | 0.0001          | 0.825 to 0.901      | 0.00047        |
| mEV TDP-43 (pg/mL)                | 0.80 | 0.0015          | 0.783 to 0.853      | 0.00002        |
| Plasma Nfl (pg/mL)                | 0.72 | 0.055           | 0.712 to 0.751      | 0.235          |
| sEV and Plasma Nfl AUC comparison |      | 0.042           | 0.034 to 0.203      | 0.005          |
| mEV and Plasma Nfl AUC comparison |      | 0.049           | 0.026 to 0.169      | 0.045          |
| <b>bvFTD vs. PSP</b>              |      |                 |                     |                |
| sEV TDP-43 (pg/mL)                | 0.93 | 0.000245        | 0.865 to 0.890      | 0.00007        |
| mEV TDP-43 (pg/mL)                | 0.85 | 0.0353          | 0.783 to 0.848      | 0.00004        |
| Plasma Nfl (pg/mL)                | 0.63 | 0.0055          | 0.612 to 0.713      | 0.235          |
| sEV and Plasma Nfl AUC comparison |      | 0.041           | 0.202 to 0.169      | 0.00008        |
| mEV and Plasma Nfl AUC comparison |      | 0.049           | 0.209 to 0.153      | 0.00004        |

<sup>a</sup> Hanley & McNeil. 1982<sup>1</sup>

<sup>b</sup> Binomial exact

SE: Standard Error

95% CI: 95% Confidence Interval

Paired t-test

1. Hanley, J. A. & McNeil, B. J. A method of comparing the areas under receiver operating characteristic curves derived from the same cases. *Radiology* **148**, 839-843 (1983). <https://doi.org/10.1148/radiology.148.3.6878708>



**Supplementary Table 4: Two-sided Spearman correlation between EV 3R/4R Tau ratio with clinical and neuropsychological and clinical scales in DESCRIBE subcohort 1: PSP cases**

| Parameters | Spearman <i>r</i> values | <i>p</i> values     |
|------------|--------------------------|---------------------|
|            | sEV 3R/4R Tau Ratio      | sEV 3R/4R Tau Ratio |
| MMSE       | <b>0.213</b>             | <b>0.017</b>        |
| MoCA       | <b>0.468</b>             | <b>0.0034</b>       |
| NPI-Q      | -0.334                   | 0.053               |
| FAQ        | -0.030                   | 0.881               |
| PSP-RS     | <b>-0.497</b>            | <b>0.0007</b>       |
| PSP-SS     | <b>-0.512</b>            | <b>0.0005</b>       |
| PSP-CDS    | <b>-0.402</b>            | <b>0.0001</b>       |
| UPDRS-III  | <b>-0.551</b>            | <b>0.0001</b>       |
| SAS        | <b>-0.345</b>            | <b>0.002</b>        |
| SEADL      | <b>0.591</b>             | <b>2.92067E-05</b>  |
| CGIs       | <b>-0.597</b>            | <b>3.76451E-05</b>  |
| FAB        | <b>-0.355</b>            | <b>0.02</b>         |
| PSP-QoL    | <b>-0.613</b>            | <b>1.20461E-05</b>  |
| Plasma Nfl | <b>-0.436</b>            | <b>0.012</b>        |

Bold values denote statistical significance at the  $p < 0.05$  level.

**Supplementary Table 5: Two-sided Spearman correlation between EV 3R/4R Tau ratio with clinical and neuropsychological scales in DESCRIBE subcohort 1: bvFTD cases**

|                    | Spearman <i>r</i> values | <i>p</i> values     |
|--------------------|--------------------------|---------------------|
| Parameters         | sEV 3R/4R Tau Ratio      | sEV 3R/4R Tau Ratio |
| MMSE               | <b>-0.618</b>            | <b>0.00001</b>      |
| MoCA               | <b>-0.667</b>            | <b>0.00014</b>      |
| NPI-Q              | <b>0.445</b>             | <b>0.0039</b>       |
| FAQ                | <b>0.512</b>             | <b>0.00085</b>      |
| CDR-SB             | <b>0.523</b>             | <b>0.00053</b>      |
| CDR plus NACC FTLD | <b>0.503</b>             | <b>0.00063</b>      |
| CBI-M              | <b>0.618</b>             | <b>2.07836E-05</b>  |
| Plasma Nfl         | <b>0.512</b>             | <b>0.00068</b>      |

Bold values denote statistical significance at the  $p < 0.05$  level.



**Supplementary Table 6: Two-sided Spearman correlation between CSF and plasma EV tau results in DESCRIBE subcohort 1**

|                                                                      | Spearman <i>r</i> values |                |                         | <i>p</i> values |                |                         |
|----------------------------------------------------------------------|--------------------------|----------------|-------------------------|-----------------|----------------|-------------------------|
|                                                                      | CSF sEV 3R Tau           | CSF sEV 4R Tau | CSF sEV 3R/4R Tau ratio | CSF sEV 3R Tau  | CSF sEV 4R Tau | CSF sEV 3R/4R Tau ratio |
| Plasma sEV 3R Tau                                                    | <b>0.240</b>             | <b>-0.396</b>  | <b>0.389</b>            | <b>0.02</b>     | <b>0.02</b>    | <b>0.02</b>             |
| Plasma sEV 4R Tau                                                    | -0.065                   | 0.030          | 0.006                   | 0.52            | 0.87           | 0.98                    |
| Plasma sEV 3R/4R Tau ratio                                           | 0.193                    | -0.339         | 0.278                   | 0.06            | 0.05           | 0.12                    |
| Bold values denote statistical significance at the $p < 0.05$ level. |                          |                |                         |                 |                |                         |
| Detected CSF EV samples: CSF sEV 3R Tau n=100. CSF sEV 4R Tau n=34.  |                          |                |                         |                 |                |                         |

**Supplementary Table 7: Two-sided Spearman correlation between EV 3R/4R Tau ratio, EV TDP-43, age, sex and disease duration in DESCRIBE subcohort 2**

| Parameters       | Spearman $r$ values |            |                     |                     | $p$ values |            |                     |                     |
|------------------|---------------------|------------|---------------------|---------------------|------------|------------|---------------------|---------------------|
|                  | sEV TDP-43          | mEV TDP-43 | sEV 3R/4R Tau ratio | mEV 3R/4R Tau ratio | sEV TDP-43 | mEV TDP-43 | sEV 3R/4R Tau ratio | mEV 3R/4R Tau ratio |
| Age              | 0.089               | 0.057      | 0.102               | 0.087               | 0.145      | 0.524      | 0.143               | 0.134               |
| Sex              | 0.053               | -0.041     | 0.071               | 0.103               | 0.102      | 0.245      | 0.178               | 0.254               |
| Disease duration | 0.074               | 0.033      | -0.023              | -0.038              | 0.236      | 0.145      | 0.224               | 0.329               |

**Supplementary Table 8: Two-sided Spearman correlation between EV 3R/4R Tau ratio, EV TDP-43 and clinical and neuropsychological scales in DESCRIBE subcohort 2: PSP cases**

| Parameters | Spearman <i>r</i> values |            |                     |                     | <i>p</i> values |            |                     |                     |
|------------|--------------------------|------------|---------------------|---------------------|-----------------|------------|---------------------|---------------------|
|            | sEV TDP-43               | mEV TDP-43 | sEV 3R/4R Tau ratio | mEV 3R/4R Tau ratio | sEV TDP-43      | mEV TDP-43 | sEV 3R/4R Tau ratio | mEV 3R/4R Tau ratio |
| MMSE       | 0.062                    | 0.0495     | <b>0.386</b>        | <b>0.303</b>        | 0.654           | 0.724      | <b>0.003</b>        | <b>0.039</b>        |
| MoCA       | 0.056                    | -0.070     | <b>0.363</b>        | <b>0.306</b>        | 0.538           | 0.445      | <b>0.002</b>        | <b>0.039</b>        |
| NPI-Q      | 0.023                    | 0.020      | <b>-0.367</b>       | <b>-0.362</b>       | 0.176           | 0.235      | <b>0.024</b>        | <b>0.029</b>        |
| FAQ        | 0.013                    | 0.018      | 0.0512              | 0.066               | 0.268           | 0.146      | 0.499               | 0.460               |
| PSP-RS     | -0.007                   | 0.030      | <b>-0.304</b>       | <b>-0.377</b>       | 0.930           | 0.730      | <b>0.002</b>        | <b>0.003</b>        |
| PSP-SS     | 0.011                    | -0.037     | <b>-0.383</b>       | <b>-0.391</b>       | 0.893           | 0.669      | <b>0.030</b>        | <b>0.002</b>        |
| PSP-CDS    | 0.006                    | -0.002     | <b>-0.365</b>       | <b>-0.241</b>       | 0.588           | 0.236      | <b>0.006</b>        | <b>0.002</b>        |
| UPDRS      | 0.010                    | -0.052     | <b>-0.225</b>       | <b>-0.237</b>       | 0.229           | 0.559      | <b>0.017</b>        | <b>0.011</b>        |
| SAS        | -0.046                   | -0.065     | <b>-0.387</b>       | <b>-0.346</b>       | 0.465           | 0.365      | <b>0.002</b>        | <b>0.019</b>        |
| SEADL      | -0.022                   | -0.042     | <b>0.390</b>        | <b>0.396</b>        | 0.791           | 0.623      | <b>0.002</b>        | <b>0.002</b>        |
| CGIs       | -0.012                   | 0.032      | <b>-0.226</b>       | <b>-0.189</b>       | 0.883           | 0.995      | <b>0.027</b>        | <b>0.029</b>        |
| FAB        | 0.062                    | -0.095     | <b>-0.194</b>       | <b>-0.134</b>       | 0.515           | 0.320      | <b>0.031</b>        | <b>0.041</b>        |
| PSP-QoL    | -0.088                   | -0.063     | <b>-0.306</b>       | <b>-0.320</b>       | 0.403           | 0.546      | <b>0.030</b>        | <b>0.002</b>        |
| Plasma NfI | -0.006                   | -0.011     | <b>-0.373</b>       | <b>-0.352</b>       | 0.941           | 0.178      | <b>0.013</b>        | <b>0.025</b>        |

Bold values denote statistical significance at the  $p < 0.05$  level.

**Supplementary Table 9: Two-sided Spearman correlation between EV 3R/4R Tau ratio, EV TDP-43 and clinical and neuropsychological scales in DESCRIBE subcohort 2: bvFTD cases**

| Parameters            | Spearman <i>r</i> values |               |                     |                     | <i>p</i> values |               |                     |                     |
|-----------------------|--------------------------|---------------|---------------------|---------------------|-----------------|---------------|---------------------|---------------------|
|                       | sEV TDP-43               | mEV TDP-43    | sEV 3R/4R Tau ratio | mEV 3R/4R Tau ratio | sEV TDP-43      | mEV TDP-43    | sEV 3R/4R Tau ratio | mEV 3R/4R Tau ratio |
| MMSE                  | <b>-0.301</b>            | <b>-0.259</b> | <b>-0.220</b>       | <b>-0.242</b>       | <b>0.031</b>    | <b>0.0423</b> | <b>0.034</b>        | <b>0.031</b>        |
| MoCA                  | <b>-0.332</b>            | <b>-0.322</b> | <b>-0.253</b>       | <b>-0.234</b>       | <b>0.026</b>    | <b>0.0318</b> | <b>0.029</b>        | <b>0.022</b>        |
| NPI-Q                 | <b>0.292</b>             | <b>0.103</b>  | <b>0.561</b>        | <b>0.363</b>        | <b>0.005</b>    | <b>0.006</b>  | <b>0.003</b>        | <b>0.002</b>        |
| FAQ                   | <b>0.281</b>             | <b>0.257</b>  | <b>0.371</b>        | <b>0.254</b>        | <b>0.001</b>    | <b>0.004</b>  | <b>0.003</b>        | <b>0.003</b>        |
| CDR-SB                | <b>0.274</b>             | <b>0.209</b>  | <b>0.330</b>        | <b>0.379</b>        | <b>0.021</b>    | <b>0.029</b>  | <b>0.003</b>        | <b>0.002</b>        |
| CDR plus<br>NACC FTLD | <b>0.461</b>             | <b>0.371</b>  | <b>0.391</b>        | <b>0.469</b>        | <b>0.001</b>    | <b>0.0002</b> | <b>0.001</b>        | <b>0.001</b>        |
| CBI-M                 | <b>0.343</b>             | <b>0.284</b>  | <b>0.349</b>        | <b>0.314</b>        | <b>0.001</b>    | <b>0.007</b>  | <b>0.001</b>        | <b>0.002</b>        |
| Plasma Nfl            | <b>0.234</b>             | <b>0.22</b>   | <b>0.347</b>        | <b>0.316</b>        | <b>0.002</b>    | <b>0.0004</b> | <b>0.005</b>        | <b>0.0002</b>       |

Bold values denote statistical significance at the  $p < 0.05$  level.

**Supplementary Table 10: Descriptive data of mutations in bvFTD and ALS**

| <b>Mutations (n=37)</b>                                                                                                   | <b>Clinical Diagnosis</b> | <b>Mutation types</b>                                                                               |
|---------------------------------------------------------------------------------------------------------------------------|---------------------------|-----------------------------------------------------------------------------------------------------|
| <i>C9orf72</i>                                                                                                            | bvFTD (n=13), ALS (n=5)   | hexanucleotide (G4C2) <sub>n</sub> repeat expansion                                                 |
| <i>GRN</i>                                                                                                                | bvFTD (n=4)               | Pathogenic/p.Val8vs<br>Pathogenic/p.Cys26<br>Pathogenic/p.Ser226fs<br>Pathogenic/p.Met142fs         |
| <i>VCP</i>                                                                                                                | bvFTD (n=4)               | Pathogenic/p.Gly157Arg<br>Pathogenic/p.Arg95Cys<br>Pathogenic/p.Gly159Arg<br>Pathogenic/p.Gly157Arg |
| <i>*TBK1</i>                                                                                                              | bvFTD (n=1)<br>ALS (n=1)  | Potentially Pathogenic/p.Leu555Ter<br>Potentially Pathogenic/p.Glu643del                            |
| <i>*MAPT</i>                                                                                                              | bvFTD (n=3)               | Pathogenic/P301L<br>Pathogenic/P364S<br>Pathogenic/IVS 10+16 C>T                                    |
| <i>CHCHD10</i>                                                                                                            | bvFTD (n=1)<br>ALS (n=1)  | Pathogenic/p.Ser59Leu<br>Pathogenic/p.Arg15Leu                                                      |
| <i>*SOD-1</i>                                                                                                             | ALS (n=2)                 | Pathogenic/p.Gly115Ser<br>Pathogenic/p.Leu145Phe                                                    |
| <i>FUS</i>                                                                                                                | ALS (n=2)                 | Pathogenic/p.Pro525Leu<br>Pathogenic/p.Ser57Del                                                     |
| *2 <i>TBK1</i> , 1 <i>MAPT</i> , 1 <i>CHCHD10</i> , and 1 <i>SOD-1</i> mutation carriers with autopsy confirmed diagnosis |                           |                                                                                                     |

**Supplementary Table 11: Descriptive data of neuropathological diagnoses in ALS, bvFTD, and PSP**

| Neuropathological diagnosis      | ADNC       | Lewy pathology stage  | Other neuropathological findings | Gene mutation     | Clinical diagnosis |
|----------------------------------|------------|-----------------------|----------------------------------|-------------------|--------------------|
| ALS-TDP                          | A3, B2, C2 |                       | CAA                              |                   | ALS                |
| ALS-TDP                          | A1, B2, C0 |                       | CAA                              |                   | ALS                |
| ALS-TDP                          | A0, B2, C0 |                       |                                  |                   | ALS                |
| ALS-TDP                          | A0, B1, C0 |                       |                                  |                   | ALS                |
| ALS-TDP                          | A1, B1, C0 |                       | CAA                              |                   | ALS                |
| ALS-TDP                          | A0, B1, C0 |                       |                                  |                   | ALS                |
| ALS-TDP                          | A1, B2, C0 |                       | ARTAG                            |                   | ALS                |
| ALS-TDP                          | A1, B1, C0 |                       |                                  |                   | ALS                |
| ALS-TDP                          | A1, B1, C0 |                       |                                  |                   | ALSci              |
| ALS-TDP                          | A0, B2, C0 |                       | CAA                              |                   | ALSci              |
| ALS-TDP                          | A1, B1, C0 |                       |                                  |                   | ALS                |
| ALS-TDP                          | A1, B1, C0 | brainstem predominant |                                  |                   | ALS                |
| ALS-TDP                          | A0, B0, C0 |                       |                                  |                   | ALS                |
| ALS-TDP                          | A0, B1, C0 | brainstem predominant |                                  |                   | ALSci              |
| ALS-TDP                          | A1, B1, C0 |                       |                                  |                   | ALS                |
| ALS-TDP                          | A0, B1, C0 | brainstem predominant | CAA                              |                   | ALS                |
| ALS-TDP                          | A1, B2, C0 |                       |                                  | <i>TBKI</i>       | ALS                |
| ALS/FTLD-TDP (subtype B)         | A1, B1, C0 |                       | CAA                              |                   | ALSci              |
| ALS/FTLD-TDP (subtype B)         | A1, B1, C0 |                       |                                  |                   | bvFTD+ALS          |
| ALS/FTLD-TDP (subtype B)         | A1, B2, C1 |                       | B cell lymphoma, CAA             |                   | ALSci              |
| ALS/FTLD-TDP (subtype B)         | A0, B0, C0 |                       | granulomatous angiitis           |                   | ALSci/ALSbi        |
| ALS/FTLD-TDP (subtype B)         | A0, B1, C0 | brainstem predominant |                                  |                   | ALS+PPA            |
| ALS/FTLD-TDP (subtype B)         | A0, B1, C0 |                       |                                  |                   | bvFTD              |
| FTLD-TDP (subtype A)             | A1, B1, C0 |                       |                                  | <i>TBKI</i>       | bvFTD              |
| FTLD-Tau (GGT type)              | A2, B1, C1 |                       | CAA                              |                   | ALSbi              |
| FTLD-Tau ( <i>MAPT</i> mutation) | A1, BX, C0 |                       | CAA                              | <i>MAPT P301L</i> | bvFTD              |
| PSP                              | A0, B0, C0 |                       |                                  |                   | PSP (possible)     |
| PSP                              | A2, B1, C0 |                       | AGD, ATRAG                       |                   | PSP (probable)     |
| PSP                              | A3, B2, C1 |                       | AGD                              |                   | PSP (possible)     |
| ALS-SOD1                         | A1, B1, C0 |                       | CAA                              | <i>SOD-1</i>      | ALSci              |
| ALS-UPS                          | A1, B1, C0 | none                  |                                  | <i>CHCHD10</i>    | ALS                |

ADNC, Alzheimer disease neuropathological change; AGD, argyrophilic grain disease; ALS, amyotrophic lateral sclerosis; ALSci, amyotrophic lateral sclerosis, cognitively impaired; ALSbi, amyotrophic lateral sclerosis, behaviorally impaired; ALS-TDP, ALS with TDP-43 pathology; ALS-SOD1, ALS due to SOD1 mutation; ALS-UPS, ALS with TDP-43/tau/FUS negative inclusions positive for markers of ubiquitin-proteasome system; ARTAG, aging related tau astroglipathy; CAA, cerebral amyloid angiopathy; CBD, corticobasal degeneration; FTLD-tau, frontotemporal lobar degeneration with tau pathology; FTLD-TDP, frontotemporal lobar degeneration with TDP-43 pathology; PPA, primary progressive aphasia; svPPA, semantic variant of PPA; bvFTD, behavioral variant of FTD. PSP, progressive supranuclear palsy;

**Supplementary Table 13: Two-sided Spearman correlation between EV 3R/4R Tau ratio, age, sex, and disease duration in Sant Pau cohort**

| Parameters       | Spearman <i>r</i> values |            | <i>p</i> values     |            |
|------------------|--------------------------|------------|---------------------|------------|
|                  | sEV 3R/4R Tau ratio      | sEV TDP-43 | sEV 3R/4R Tau ratio | sEV TDP-43 |
| Age              | 0.005                    | 0.087      | 0.256               | 0.274      |
| Sex              | 0.075                    | 0.096      | 0.345               | 0.330      |
| Disease duration | 0.023                    | 0.156      | 0.145               | 0.089      |

**Supplementary Table 14: The receiver operating characteristic area under the curve of diagnostic groups for EV 3R/4R Tau ratio and EV TDP-43 levels**

| <b>Sant Pau cohort</b>     | AUC  | SE <sup>a</sup> | 95% CI <sup>b</sup> | <i>p</i> value |
|----------------------------|------|-----------------|---------------------|----------------|
| <b>PSP vs. HC</b>          |      |                 |                     |                |
| sEV 3R/4R Tau Ratio        | 1.00 | 0.000           | 0.960 to 1.000      | 0.00004        |
| mEV 3R/4R Tau Ratio        | 1.00 | 0.000           | 0.960 to 1.000      | 0.00001        |
| sEV and mEV AUC comparison |      | 0.035           | -0.020 to 0.154     | 0.123          |
| <b>PSP vs ALS</b>          |      |                 |                     |                |
| sEV 3R/4R Tau Ratio        | 0.99 | 0.0002          | 0.962 to 1.000      | 0.00007        |
| mEV 3R/4R Tau Ratio        | 0.94 | 0.0023          | 0.881 to 0.980      | 0.000023       |
| sEV and mEV AUC comparison |      | 0.036           | -0.023 to 0.036     | 0.254          |
| <b>PSP vs ALS-FTD</b>      |      |                 |                     |                |
| sEV 3R/4R Tau Ratio        | 0.98 | 0.0149          | 0.937 to 0.999      | 0.000052       |
| mEV 3R/4R Tau Ratio        | 0.93 | 0.0253          | 0.870 to 0.976      | 0.000044       |
| sEV and mEV AUC comparison |      | 0.0456          | -0.0032 to 0.076    | 0.231          |
| <b>PSP vs bvFTD</b>        |      |                 |                     |                |
| sEV 3R/4R Tau Ratio        | 1.00 | 0.000           | 0.969 to 1.000      | 0.000056       |
| mEV 3R/4R Tau Ratio        | 1.00 | 0.000           | 0.969 to 1.000      | 0.000012       |
| sEV and mEV AUC comparison |      | 0.085           | -0.051 to 0.110     | 0.114          |
| <b>bvFTD vs HC</b>         |      |                 |                     |                |
| sEV 3R/4R Tau Ratio        | 0.95 | 0.0163          | 0.905 to 0.985      | 0.000032       |
| mEV 3R/4R Tau Ratio        | 0.96 | 0.0254          | 0.918 to 0.990      | 0.000014       |
| sEV and mEV AUC comparison |      | 0.0751          | -0.041 to 0.230     | 0.420          |
| <b>bvFTD vs ALS</b>        |      |                 |                     |                |
| sEV 3R/4R Tau Ratio        | 0.90 | 0.0239          | 0.845 to 0.948      | 0.000047       |
| mEV 3R/4R Tau Ratio        | 0.93 | 0.0135          | 0.875 to 0.966      | 0.00003        |
| sEV and mEV AUC comparison |      | 0.0441          | -0.017 to 0.135     | 0.118          |
| <b>bvFTD vs ALS-FTD</b>    |      |                 |                     |                |
| sEV 3R/4R Tau Ratio        | 0.96 | 0.0140          | 0.920 to 0.990      | 0.00001        |
| mEV 3R/4R Tau Ratio        | 0.97 | 0.0125          | 0.931 to 0.994      | 0.00004        |
| sEV and mEV AUC comparison |      | 0.046           | -0.017 to 0.141     | 0.144          |
| <b>Sant Pau cohort</b>     |      |                 |                     |                |
|                            | AUC  | SE <sup>a</sup> | 95% CI <sup>b</sup> | <i>p</i> value |
| <b>ALS vs HC</b>           |      |                 |                     |                |
| sEV TDP-43 (pg/mL)         | 0.94 | 0.0184          | 0.892 to 0.981      | 0.00007        |
| mEV TDP-43 (pg/mL)         | 0.93 | 0.241           | 0.867 to 0.969      | 0.00001        |
| sEV and mEV AUC comparison |      | 0.051           | -0.017 to 0.135     | 0.532          |
| <b>ALS vs. ALS-FTD</b>     |      |                 |                     |                |
| sEV TDP-43 (pg/mL)         | 0.58 | 0.0519          | 0.491 to 0.673      | 0.1051         |
| mEV TDP-43 (pg/mL)         | 0.56 | 0.0523          | 0.476 to 0.658      | 0.186          |
| sEV and mEV AUC comparison |      | 0.046           | -0.017 to 0.245     | 0.148          |
| <b>ALS vs. PSP</b>         |      |                 |                     |                |



|                                                                                                                                             |      |        |                 |          |
|---------------------------------------------------------------------------------------------------------------------------------------------|------|--------|-----------------|----------|
| sEV TDP-43 (pg/mL)                                                                                                                          | 0.96 | 0.0147 | 0.910 to 0.991  | 0.00004  |
| mEV TDP-43 (pg/mL)                                                                                                                          | 0.96 | 0.0151 | 0.910 to 0.991  | 0.00007  |
| sEV and mEV AUC comparison                                                                                                                  |      | 0.055  | -0.021 to 0.125 | 0.117    |
| <b>ALS vs. bvFTD</b>                                                                                                                        |      |        |                 |          |
| sEV TDP-43 (pg/mL)                                                                                                                          | 0.76 | 0.0376 | 0.687 to 0.832  | 0.000045 |
| mEV TDP-43 (pg/mL)                                                                                                                          | 0.76 | 0.0393 | 0.691 to 0.835  | 0.000023 |
| sEV and mEV AUC comparison                                                                                                                  |      | 0.052  | -0.021 to 0.120 | 0.432    |
| <b>bvFTD vs HC</b>                                                                                                                          |      |        |                 |          |
| sEV TDP-43 (pg/mL)                                                                                                                          | 0.87 | 0.0311 | 0.803 to 0.926  | 0.00004  |
| mEV TDP-43 (pg/mL)                                                                                                                          | 0.82 | 0.0365 | 0.744 to 0.884  | 0.00007  |
| Plasma Nfl (pg/mL)                                                                                                                          | 0.78 | 0.0265 | 0.734 to 0.842  | 0.003    |
| sEV and mEV TDP-43 AUC comparison                                                                                                           |      | 0.062  | -0.045 to 0.121 | 0.632    |
| sEV and Plasma Nfl AUC comparison                                                                                                           |      | 0.0312 | 0.116 to 0.21   | 0.00008  |
| mEV and Plasma Nfl AUC comparison                                                                                                           |      | 0.016  | 0.112 to 0.156  | 0.00007  |
| <b>bvFTD vs. ALS-FTD</b>                                                                                                                    |      |        |                 |          |
| sEV TDP-43 (pg/mL)                                                                                                                          | 0.82 | 0.0353 | 0.745 to 0.881  | 0.00001  |
| mEV TDP-43 (pg/mL)                                                                                                                          | 0.81 | 0.0363 | 0.736 to 0.874  | 0.00004  |
| sEV and mEV AUC comparison                                                                                                                  |      | 0.0785 | -0.012 to 0.187 | 0.119    |
| <b>bvFTD vs. PSP</b>                                                                                                                        |      |        |                 |          |
| sEV TDP-43 (pg/mL)                                                                                                                          | 0.91 | 0.0260 | 0.851 to 0.959  | 0.00007  |
| mEV TDP-43 (pg/mL)                                                                                                                          | 0.89 | 0.0273 | 0.830 to 0.947  | 0.00009  |
| Plasma Nfl (pg/mL)                                                                                                                          | 0.71 | 0.0365 | 0.689 to 0.789  | 0.0874   |
| sEV and mEV AUC comparison                                                                                                                  |      | 0.063  | -0.046 to 0.176 | 0.896    |
| sEV and Plasma Nfl AUC comparison                                                                                                           |      | 0.0152 | 0.102 to 0.256  | 0.00007  |
| mEV and Plasma Nfl AUC comparison                                                                                                           |      | 0.0315 | 0.147 to 0.175  | 0.00001  |
| <b>ALS-FTD vs. HC</b>                                                                                                                       |      |        |                 |          |
| sEV TDP-43 (pg/mL)                                                                                                                          | 0.98 | 0.0003 | 0.946 to 0.999  | 0.000045 |
| mEV TDP-43 (pg/mL)                                                                                                                          | 0.98 | 0.0025 | 0.933 to 0.997  | 0.000014 |
| sEV and mEV AUC comparison                                                                                                                  |      | 0.075  | -0.012 to 0.176 | 0.119    |
| <b>ALS-FTD vs. PSP</b>                                                                                                                      |      |        |                 |          |
| sEV TDP-43 (pg/mL)                                                                                                                          | 0.99 | 0.0004 | 0.955 to 1.000  | 0.00007  |
| mEV TDP-43 (pg/mL)                                                                                                                          | 0.99 | 0.0003 | 0.954 to 1.000  | 0.00008  |
| sEV and mEV AUC comparison                                                                                                                  |      | 0.030  | -0.018 to 0.221 | 0.387    |
| <sup>a</sup> Hanley & McNeil. 1982<br><sup>b</sup> Binomial exact<br>SE: Standard Error<br>95% CI: 95% Confidence Interval<br>Paired t-test |      |        |                 |          |



**Supplementary Table 15: Descriptive data of mutations in bvFTD and ALS in Sant Pau cohort**

| <b>Mutations (n=34)</b> | <b>Clinical Diagnosis</b>                 | <b>Mutation types</b>                                                                                                                                        |
|-------------------------|-------------------------------------------|--------------------------------------------------------------------------------------------------------------------------------------------------------------|
| <i>C9orf72</i>          | bvFTD (n=12), ALS (n=1),<br>ALS-FTD (n=3) | hexanucleotide (G4C2) <sub>n</sub> repeat expansion                                                                                                          |
| <i>GRN</i>              | bvFTD (n=6)                               | Pathogenic/c.933+1G>A<br>Pathogenic/c.933+1G>A<br>Pathogenic/c.933+1G>A<br>Pathogenic/c.933+1G>A<br>Pathogenic/ c.1095-1096del<br>Pathogenic/ c.1095-1096del |
| <i>VCP</i>              | bvFTD (n=1)                               | Pathogenic/ K618X                                                                                                                                            |
| <i>TBK1</i>             | bvFTD (n=3)                               | Pathogenic/ W445X<br>Pathogenic/ H528Y<br>Pathogenic/ Asp135Asn                                                                                              |
| <i>SOD-1</i>            | ALS (n=3), ALS-FTD (n=1)                  | Pathogenic/ c.112G>A<br>Pathogenic/ c.339C>G<br>Pathogenic/ c.112G>A<br>Pathogenic/ c.339C>G                                                                 |
| <i>FUS</i>              | ALS (n=3)                                 | Pathogenic/ c.1562G>A<br>Pathogenic/ c.169_171delTCT<br>Pathogenic/c.1561C>T                                                                                 |
| <i>TARDBP</i> n=1       | bvFTD (n=1)                               | Pathogenic/A90V                                                                                                                                              |

**Supplementary Table 16: Two-sided Spearman correlation between sEV 3R/4R Tau ratio, sEV TDP-43, and clinical and neuropsychological scales in Sant Pau cohort: PSP cases**

| Parameters | Spearman $r$ values |                     |            |                     | $p$ values |                     |            |                     |
|------------|---------------------|---------------------|------------|---------------------|------------|---------------------|------------|---------------------|
|            | sEV TDP-43          | sEV 3R/4R Tau ratio | mEV TDP-43 | mEV 3R/4R Tau ratio | sEV TDP-43 | sEV 3R/4R Tau ratio | mEV TDP-43 | mEV 3R/4R Tau ratio |
| MMSE       | -0.097              | <b>0.183</b>        | -0.085     | <b>0.164</b>        | 0.590      | <b>0.018</b>        | 0.658      | <b>0.039</b>        |
| PSP-RS     | 0.008               | <b>-0.202</b>       | 0.052      | <b>-0.167</b>       | 0.961      | <b>0.009</b>        | 0.452      | <b>0.002</b>        |
| UPDRS-III  | -0.098              | <b>-0.708</b>       | -0.074     | <b>-0.304</b>       | 0.392      | <b>0.006</b>        | 0.365      | <b>0.001</b>        |
| FAB        | -0.165              | <b>-0.630</b>       | -0.023     | <b>-0.307</b>       | 0.431      | <b>0.003</b>        | 0.152      | <b>0.032</b>        |
| Plasma Nfl | 0.102               | <b>-0.425</b>       | 0.053      | <b>-0.402</b>       | 0.563      | <b>0.0001</b>       | 0.223      | <b>0.001</b>        |

Bold values denote statistical significance at the  $p < 0.05$  level.

**Supplementary Table 17: Two-sided Spearman correlation between sEV 3R/4R Tau ratio, sEV TDP-43, and clinical and neuropsychological scales in Sant Pau cohort: bvFTD cases**

| Parameters            | Spearman <i>r</i> values |                     |               |                     | <i>p</i> values |                     |              |                     |
|-----------------------|--------------------------|---------------------|---------------|---------------------|-----------------|---------------------|--------------|---------------------|
|                       | sEV TDP-43               | sEV 3R/4R Tau ratio | mEV TDP-43    | mEV 3R/4R Tau ratio | sEV TDP-43      | sEV 3R/4R Tau ratio | mEV TDP-43   | mEV 3R/4R Tau ratio |
| MMSE                  | <b>-0.200</b>            | <b>-0.209</b>       | <b>-0.184</b> | <b>-0.171</b>       | <b>0.018</b>    | <b>0.016</b>        | <b>0.022</b> | <b>0.026</b>        |
| NPI-Q                 | <b>0.209</b>             | <b>0.239</b>        | <b>0.209</b>  | <b>0.205</b>        | <b>0.009</b>    | <b>0.008</b>        | <b>0.019</b> | <b>0.008</b>        |
| CDR-SB                | <b>0.280</b>             | <b>0.269</b>        | <b>0.284</b>  | <b>0.235</b>        | <b>0.006</b>    | <b>0.007</b>        | <b>0.036</b> | <b>0.046</b>        |
| CDR plus NACC<br>FTLD | <b>0.267</b>             | <b>0.277</b>        | <b>0.259</b>  | <b>0.254</b>        | <b>0.003</b>    | <b>0.011</b>        | <b>0.037</b> | <b>0.039</b>        |
| Plasma Nfl            | <b>0.460</b>             | <b>0.457</b>        | <b>0.303</b>  | <b>0.386</b>        | <b>0.002</b>    | <b>0.0001</b>       | <b>0.008</b> | <b>0.001</b>        |

Bold values denote statistical significance at the  $p < 0.05$  level.

**Supplementary Table 18: Two-sided Spearman correlation between sEV 3R/4R Tau ratio, sEV TDP-43, and clinical and neuropsychological scales in Sant Pau cohort: ALS cases**

| Parameters           | Spearman <i>r</i> values |                     |               |                     | <i>p</i> values |                     |              |                     |
|----------------------|--------------------------|---------------------|---------------|---------------------|-----------------|---------------------|--------------|---------------------|
|                      | sEV TDP-43               | mEV 3R/4R Tau ratio | mEV TDP-43    | mEV 3R/4R Tau ratio | sEV TDP-43      | sEV 3R/4R Tau ratio | mEV TDP-43   | mEV 3R/4R Tau ratio |
| ALS FRS-R            | <b>-0.212</b>            | -0.032              | <b>-0.200</b> | 0.056               | <b>0.015</b>    | 0.776               | <b>0.011</b> | 0.236               |
| Time since diagnosis | <b>0.514</b>             | 0.065               | <b>0.233</b>  | 0.035               | <b>0.0004</b>   | 0.967               | <b>0.029</b> | 0.102               |

Bold values denote statistical significance at the  $p < 0.05$  level.

**Supplementary Table 19: Two-sided Spearman correlation between sEV 3R/4R Tau ratio, sEV TDP-43, and clinical and neuropsychological scales in Sant Pau cohort: ALS-FTD cases**

| Parameters           | Spearman <i>r</i> values |                     |               |                     | <i>p</i> values |                     |              |                     |
|----------------------|--------------------------|---------------------|---------------|---------------------|-----------------|---------------------|--------------|---------------------|
|                      | sEV TDP-43               | sEV 3R/4R Tau ratio | mEV TDP-43    | mEV 3R/4R Tau ratio | sEV TDP-43      | sEV 3R/4R Tau ratio | mEV TDP-43   | mEV 3R/4R Tau ratio |
| MMSE                 | <b>-0.535</b>            | 0.0319              | <b>-0.533</b> | 0.036               | <b>0.0182</b>   | 0.971               | <b>0.018</b> | 0.452               |
| ECAS Total           | <b>-0.799</b>            | 0.0492              | <b>-0.778</b> | 0.052               | <b>0.0001</b>   | 0.790               | <b>0.002</b> | 0.103               |
| ALS FRS-R            | <b>-0.702</b>            | 0.124               | <b>-0.699</b> | 0.123               | <b>0.0002</b>   | 0.375               | <b>0.003</b> | 0.189               |
| Time since diagnosis | <b>0.445</b>             | -0.090              | <b>0.404</b>  | 0.009               | <b>0.0005</b>   | 0.491               | <b>0.001</b> | 0.320               |

Bold values denote statistical significance at the  $p < 0.05$  level.

**Supplementary Table 20: Comparisons of AUCs and CIs for the different cohorts**

|                                 | AUC  | SE <sup>a</sup> | 95% CI <sup>b</sup> | <i>p</i> value |
|---------------------------------|------|-----------------|---------------------|----------------|
| <b>3R/4R Tau ratio</b>          |      |                 |                     |                |
| <b>PSP vs. HC</b>               |      |                 |                     |                |
| Subcohort 1 sEV 3R/4R Tau Ratio | 0.96 | 0.035           | 0.834 to 0.984      | 0.00004        |
| Subcohort 2 sEV 3R/4R Tau Ratio | 0.98 | 0.007           | 0.960 to 0.997      | 0.000078       |
| Sant Pau sEV 3R/4R Tau Ratio    | 1.00 | 0.000           | 0.960 to 1.000      | 0.00002        |
| <b>PSP vs. bvFTD</b>            |      |                 |                     |                |
| Subcohort 1 sEV 3R/4R Tau Ratio | 0.99 | 0.007           | 0.937 to 1.000      | 0.00001        |
| Subcohort 2 sEV 3R/4R Tau Ratio | 0.98 | 0.006           | 0.973 to 0.997      | 0.00003        |
| Sant Pau sEV 3R/4R Tau Ratio    | 1.00 | 0.000           | 0.969 to 1.000      | 0.000045       |
| <b>bvFTD vs HC</b>              |      |                 |                     |                |
| Subcohort 1 sEV 3R/4R Tau Ratio | 0.93 | 0.023           | 0.884 to 0.996      | 0.000041       |
| Subcohort 2 sEV 3R/4R Tau Ratio | 0.91 | 0.016           | 0.873 to 0.944      | 0.000052       |
| Sant Pau sEV 3R/4R Tau Ratio    | 0.95 | 0.0163          | 0.905 to 0.985      | 0.00004        |
| <b>bvFTD&amp;ALS</b>            |      |                 |                     |                |
| Subcohort 1 n/a                 |      |                 |                     |                |
| Subcohort 2 sEV 3R/4R Tau Ratio | 0.89 | 0.004           | 0.874 to 0.913      | 0.00007        |
| Sant Pau sEV 3R/4R Tau Ratio    | 0.90 | 0.0239          | 0.845 to 0.948      | 0.00006        |
|                                 | AUC  | SE <sup>a</sup> | 95% CI <sup>b</sup> | <i>p</i> value |
| <b>TDP-43</b>                   |      |                 |                     |                |
| <b>bvFTD vs. PSP</b>            |      |                 |                     |                |
| Subcohort 1 n/a                 |      |                 |                     |                |
| Subcohort 2 sEV TDP-43 (pg/mL)  | 0.93 | 0.0002          | 0.865 to 0.890      | 0.00008        |
| Sant Pau sEV TDP-43 (pg/mL)     | 0.91 | 0.0260          | 0.851 to 0.959      | 0.000047       |
| <b>bvFTD vs HC</b>              |      |                 |                     |                |
| Subcohort 1 n/a                 |      |                 |                     |                |
| Subcohort 2 sEV TDP-43 (pg/mL)  | 0.85 | 0.0001          | 0.825 to 0.901      | 0.000045       |
| Sant Pau sEV TDP-43 (pg/mL)     | 0.87 | 0.0311          | 0.803 to 0.926      | 0.00002        |
| <b>bvFTD vs. ALS</b>            |      |                 |                     |                |
| Subcohort 1 n/a                 |      |                 |                     |                |
| Subcohort 2 sEV TDP-43 (pg/mL)  | 0.91 | 0.016           | 0.878 to 0.943      | 0.00005        |
| Sant Pau sEV TDP-43 (pg/mL)     | 0.76 | 0.0376          | 0.687 to 0.832      | 0.00007        |
| <b>ALS vs. HC</b>               |      |                 |                     |                |
| Subcohort 1 n/a                 |      |                 |                     |                |
| Subcohort 2 sEV TDP-43 (pg/mL)  | 0.99 | 0.003           | 0.972 to 1.000      | 0.00008        |



|                        |            |      |        |                   |         |
|------------------------|------------|------|--------|-------------------|---------|
| Sant Pau<br>(pg/mL)    | sEV TDP-43 | 0.94 | 0.0184 | 0.892 to<br>0.981 | 0.00008 |
| <b>ALS vs. PSP</b>     |            |      |        |                   |         |
| Subcohort 1 n/a        |            |      |        |                   |         |
| Subcohort 2<br>(pg/mL) | sEV TDP-43 | 0.99 | 0.003  | 0.980 to<br>1.000 | 0.00004 |
| Sant Pau<br>(pg/mL)    | sEV TDP-43 | 0.96 | 0.0147 | 0.910 to<br>0.991 | 0.00006 |
| Paired t-test          |            |      |        |                   |         |

**Supplementary Table 21: The receiver operating characteristic area under the curve(ROCAUC)/Precision recall curve (PRAUC) of diagnostic groups for sEV and mEV 3R/4R Tau ratio, sEV and mEV TDP-43 levels and plasma Nfl levels**

| <b>DESCRIBE<br/>subcohort 1</b> | ROCAUC/<br>PRAUC | 95% CI          | Disease<br>Prevalence | <b>DESCRIBE<br/>subcohort 2</b> | ROCAUC/<br>PRAUC | 95% CI                          | Disease<br>Prevalence                   |
|---------------------------------|------------------|-----------------|-----------------------|---------------------------------|------------------|---------------------------------|-----------------------------------------|
| <b>PSP vs. HC</b>               |                  |                 |                       | <b>PSP vs. HC</b>               |                  |                                 |                                         |
| sEV 3R/4R Tau Ratio             | 0.96             |                 |                       | sEV 3R/4R Tau Ratio             | 0.98             |                                 |                                         |
| sEV 3R/4R Tau Ratio<br>PRAUC    | 0.91             | 0.84 to<br>0.95 | 0.00005 for PSP       | sEV 3R/4R Tau Ratio<br>PRAUC    | 0.90             | 0.83 to<br>0.96                 | 0.00005 for PSP                         |
|                                 |                  |                 |                       | mEV 3R/4R Tau Ratio             | 0.90             |                                 |                                         |
|                                 |                  |                 |                       | mEV 3R/4R Tau Ratio<br>PRAUC    | 0.85             | 0.81 to<br>0.92                 | 0.00005 for PSP                         |
| <b>PSP vs. AD</b>               |                  |                 |                       | <b>PSP vs ALS</b>               |                  |                                 |                                         |
| sEV 3R/4R Tau Ratio             | 0.99             |                 |                       | sEV 3R/4R Tau Ratio             | 0.96             |                                 |                                         |
| sEV 3R/4R Tau Ratio<br>PRAUC    | 0.92             | 0.83 to<br>0.94 | 0.00005 for PSP       | sEV 3R/4R Tau Ratio<br>PRAUC    | 0.89-0.90        | 0.86 to<br>0.93/0.85<br>to 0.91 | 0.00005 for<br>PSP/0.000006 for<br>ALS  |
|                                 |                  |                 |                       | mEV 3R/4R Tau Ratio             | 0.91             |                                 |                                         |
|                                 |                  |                 |                       | mEV 3R/4R Tau Ratio<br>PRAUC    | 0.86-0.87        | 0.83 to<br>0.91/0.84<br>to 0.92 | 0.00005 for<br>PSP/0.000006 for<br>ALS  |
| <b>PSP vs. svPPA</b>            |                  |                 |                       | <b>PSP vs. bvFTD</b>            |                  |                                 |                                         |
| sEV 3R/4R Tau Ratio             | 0.96             |                 |                       | sEV 3R/4R Tau Ratio             | 0.98             |                                 |                                         |
| sEV 3R/4R Tau Ratio<br>PRAUC    | 0.90             | 0.86 to<br>0.92 | 0.00005 for PSP       | sEV 3R/4R Tau Ratio<br>PRAUC    | 0.92-0.93        | 0.86 to<br>0.94/0.85<br>to 0.96 | 0.00005 for<br>PSP/0.00015 for<br>bvFTD |
|                                 |                  |                 |                       | mEV 3R/4R Tau Ratio             | 0.97             |                                 |                                         |
|                                 |                  |                 |                       | mEV 3R/4R Tau Ratio<br>PRAUC    | 0.90-0.91        | 0.83 to<br>0.94/0.84<br>to 0.95 | 0.00005 for<br>PSP/0.00015 for<br>bvFTD |
| <b>PSP vs bvFTD</b>             |                  |                 |                       | <b>bvFTD vs HC</b>              |                  |                                 |                                         |
| sEV 3R/4R Tau Ratio             | 0.99             |                 |                       | sEV 3R/4R Tau Ratio             | 0.91             |                                 |                                         |

|                              |               |                                     |                                       |                              |           |                                 |                                          |
|------------------------------|---------------|-------------------------------------|---------------------------------------|------------------------------|-----------|---------------------------------|------------------------------------------|
| sEV 3R/4R Tau Ratio<br>PRAUC | 0.93-<br>0.94 | 0.85 to<br>0.96/<br>0.84 to<br>0.97 | 0.00005 for<br>PSP / 0.00015<br>bvFTD | sEV 3R/4R Tau Ratio<br>PRAUC | 0.86      | 0.81 to<br>0.90                 | 0.00015 for<br>bvFTD                     |
|                              |               |                                     |                                       | mEV 3R/4R Tau Ratio          | 0.90      |                                 |                                          |
|                              |               |                                     |                                       | mEV 3R/4R Tau Ratio<br>PRAUC | 0.84      | 0.79 to<br>0.89                 | 0.00015 for<br>bvFTD                     |
| <b>bvFTD vs. HC</b>          |               |                                     |                                       | <b>bvFTD vs. ALS</b>         |           |                                 |                                          |
| sEV 3R/4R Tau Ratio          | 0.93          |                                     |                                       | sEV 3R/4R Tau Ratio          | 0.89      |                                 |                                          |
| sEV 3R/4R Tau Ratio<br>PRAUC | 0.86          | 0.81 to<br>0.91                     | 0.00015 for<br>bvFTD                  | sEV 3R/4R Tau Ratio PR       | 0.83-0.85 | 0.78 to<br>0.92/0.80<br>to 0.93 | 0.00015 for<br>bvFTD/0.000006<br>for ALS |
|                              |               |                                     |                                       | mEV 3R/4R Tau Ratio          | 0.86      |                                 |                                          |
|                              |               |                                     |                                       | mEV 3R/4R Tau Ratio<br>PRAUC | 0.80-0.82 | 0.76 to<br>0.89/0.78<br>to 0.92 | 0.00015 for<br>bvFTD/0.000006<br>for ALS |
| <b>bvFTD vs. AD</b>          |               |                                     |                                       |                              |           |                                 |                                          |
| sEV 3R/4R Tau Ratio          | 0.90          |                                     |                                       |                              |           |                                 |                                          |
| sEV 3R/4R Tau Ratio<br>PRAUC | 0.88          | 0.86 to<br>0.93                     | 0.00015 for<br>bvFTD                  |                              |           |                                 |                                          |
|                              |               |                                     |                                       |                              |           |                                 |                                          |
| <b>bvFTD vs. svPPA</b>       |               |                                     |                                       |                              |           |                                 |                                          |
| sEV 3R/4R Tau Ratio          | 0.95          |                                     |                                       |                              |           |                                 |                                          |
| sEV 3R/4R Tau Ratio<br>PRAUC | 0.91          | 0.86 to<br>0.93                     | 0.00015 for<br>bvFTD                  |                              |           |                                 |                                          |
|                              |               |                                     |                                       | <b>ALS vs HC</b>             |           |                                 |                                          |
|                              |               |                                     |                                       | sEV TDP-43 (pg/mL)           | 0.99      |                                 |                                          |

|                             |           |                           |                                    |
|-----------------------------|-----------|---------------------------|------------------------------------|
| sEV TDP-43 (pg/mL)<br>PRAUC | 0.91      | 0.86 to 0.93              | 0.000006 for ALS                   |
| mEV TDP-43 (pg/mL)          | 0.92      |                           |                                    |
| mEV TDP-43 (pg/mL)<br>PRAUC | 0.84      | 0.79 to 0.91              | 0.000006 for ALS                   |
| Plasma Nfl (pg/mL)          | 0.80      |                           |                                    |
| Plasma Nfl (pg/mL)<br>PRAUC | 0,74      | 0.68 to 0.81              | 0.000006 for ALS                   |
| <b>ALS vs. PSP</b>          |           |                           |                                    |
| sEV TDP-43 (pg/mL)          | 0.99      |                           |                                    |
| sEV TDP-43 (pg/mL)<br>PRAUC | 0.93-0.92 | 0.90 to 0.98/0.86 to 0.96 | 0.000006 for ALS/0.00005 for PSP   |
| mEV TDP-43 (pg/mL)          | 0.94      |                           |                                    |
| mEV TDP-43 (pg/mL)<br>PRAUC | 0.89-0.90 | 0.86 to 0.91/0.84 to 0.93 | 0.000006 for ALS/0.00005 for PSP   |
| Plasma Nfl (pg/mL)          | 0.61      |                           |                                    |
| Plasma Nfl (pg/mL)<br>PRAUC | 0.57-0.52 | 0.52 to 0.71/0.48 to 0.60 | 0.000006 for ALS/0.00005 for PSP   |
| <b>ALS vs. bvFTD</b>        |           |                           |                                    |
| sEV TDP-43 (pg/mL)          | 0.91      |                           |                                    |
| sEV TDP-43 (pg/mL)<br>PRAUC | 0.86-0.88 | 0.81 to 0.92/0.82 to 0.95 | 0.000006 for ALS/0.00015 for bvFTD |
| mEV TDP-43 (pg/mL)          | 0.88      |                           |                                    |
| mEV TDP-43 (pg/mL)<br>PRAUC | 0.82-0.85 | 0.78 to 0.89/0.83 to 0.96 | 0.000006 for ALS/0.00015 for bvFTD |
| Plasma Nfl (pg/mL)          | 0.60      |                           |                                    |
| Plasma Nfl (pg/mL)<br>PRAUC | 0.55-0.52 | 0.80 to 0.68/0.50 to 0.63 | 0.000006 for ALS/0.00015 for bvFTD |

| <b>bvFTD vs. HC</b>         |           |                                 |  |                                         |
|-----------------------------|-----------|---------------------------------|--|-----------------------------------------|
| sEV TDP-43 (pg/mL)          | 0.85      |                                 |  |                                         |
| sEV TDP-43 (pg/mL)<br>PRAUC | 0.81      | 0.78 to<br>0.86                 |  | 0.00015 for<br>bvFTD                    |
| mEV TDP-43 (pg/mL)          | 0.80      |                                 |  |                                         |
| mEV TDP-43 (pg/mL)<br>PRAUC | 0.76      | 0.72 to<br>0.82                 |  | 0.00015 for<br>bvFTD                    |
| Plasma Nfl (pg/mL)          | 0.72      |                                 |  |                                         |
| Plasma Nfl (pg/mL)<br>PRAUC | 0.63      | 0.55 to<br>0.71                 |  | 0.00015 for<br>bvFTD                    |
| <b>bvFTD vs. PSP</b>        |           |                                 |  |                                         |
| sEV TDP-43 (pg/mL)          | 0.93      |                                 |  |                                         |
| sEV TDP-43 (pg/mL)<br>PRAUC | 0.89-0.91 | 0.86 to<br>0.92/0.89<br>to 0.96 |  | 0.00015 for<br>bvFTD/0.00005<br>for PSP |
| mEV TDP-43 (pg/mL)          | 0.85      |                                 |  |                                         |
| mEV TDP-43 (pg/mL)<br>PRAUC | 0.80-0.82 | 0.76 to<br>0.89/0.77<br>to 0.89 |  | 0.00015 for<br>bvFTD/0.00005<br>for PSP |
| Plasma Nfl (pg/mL)          | 0.63      |                                 |  |                                         |
| Plasma Nfl (pg/mL)<br>PRAUC | 0.52-0.50 | 0.48 to<br>0.60/0.45<br>to 0.63 |  | 0.00015 for<br>bvFTD/0.00005<br>for PSP |

ALS prevalence 0.6 - 3.8 per 100 000 persons<sup>1</sup>

PSP prevalence 5–7 per 100,000 persons<sup>2</sup>

bvFTD prevalence 15-22 per 100 000 person<sup>3</sup>

1. Longinetti, E. & Fang, F. Epidemiology of amyotrophic lateral sclerosis: an update of recent literature. *Curr Opin Neurol* **32**, 771-776 (2019). <https://doi.org:10.1097/WCO.0000000000000730>
2. Barer, Y. *et al.* Epidemiology of Progressive Supranuclear Palsy: Real World Data from the Second Largest Health Plan in Israel. *Brain Sci* **12** (2022). <https://doi.org:10.3390/brainsci12091126>
3. Onyike, C. U. & Diehl-Schmid, J. The epidemiology of frontotemporal dementia. *Int Rev Psychiatry* **25**, 130-137 (2013). <https://doi.org:10.3109/09540261.2013.776523>

**Supplementary Table 22: The receiver operating characteristic area under the curve (ROCAUC)/Precision recall curve (PRAUC)of diagnostic groups for EV 3R/4R Tau ratio and EV TDP-43 levels, Sant Pau cohort**

| <b>Sant Pau cohort</b>       | <b>ROCAUC/<br/>PRAUC</b> | <b>95% CI</b>                | <b>Disease Prevalence</b>              |
|------------------------------|--------------------------|------------------------------|----------------------------------------|
| <b>PSP vs. HC</b>            |                          |                              |                                        |
| sEV 3R/4R Tau Ratio          | 1.00                     |                              |                                        |
| sEV 3R/4R Tau Ratio<br>PRAUC | 0.92                     | 0.86 to 0.93                 | 0.00005 for PSP                        |
| mEV 3R/4R Tau Ratio          | 1.00                     |                              |                                        |
| mEV 3R/4R Tau Ratio<br>PRAUC | 0.89                     | 0.83 to 0.91                 | 0.00005 for PSP                        |
| <b>PSP vs ALS</b>            |                          |                              |                                        |
| sEV 3R/4R Tau Ratio          | 0.99                     |                              |                                        |
| sEV 3R/4R Tau Ratio<br>PRAUC | 0.92-0.91                | 0.89 to 0.96<br>0.88 to 0.93 | 0.00005 for PSP<br>/0.000006 for ALS   |
| mEV 3R/4R Tau Ratio          | 0.94                     |                              |                                        |
| mEV 3R/4R Tau Ratio<br>PRAUC | 0.83-0.86                | 0.79 to 0.86<br>0.78 to 0.89 | 0.00005 for PSP<br>/0.000006 for ALS   |
| <b>PSP vs ALS-FTD</b>        |                          |                              |                                        |
| sEV 3R/4R Tau Ratio          | 0.98                     |                              |                                        |
| sEV 3R/4R Tau Ratio<br>PRAUC | 0.90                     | 0.83 to 0.96                 | 0.00005 for PSP                        |
| mEV 3R/4R Tau Ratio          | 0.93                     |                              |                                        |
| mEV 3R/4R Tau Ratio<br>PRAUC | 0.82                     | 0.76 to 0.89                 | 0.00005 for PSP                        |
| <b>PSP vs bvFTD</b>          |                          |                              |                                        |
| sEV 3R/4R Tau Ratio          | 1.00                     |                              |                                        |
| sEV 3R/4R Tau Ratio<br>PRAUC | 0.93-0.92                | 0.89 to 0.98<br>0.88 to 0.96 | 0.00005for PSP<br>/0.00015 for bvFTD   |
| mEV 3R/4R Tau Ratio          | 1.00                     |                              |                                        |
| mEV 3R/4R Tau Ratio<br>PRAUC | 0.90-0.91                | 0.86 to 0.94<br>0.88 to 0.96 | 0.00005for PSP<br>/0.00015 for bvFTD   |
| <b>bvFTD vs HC</b>           |                          |                              |                                        |
| sEV 3R/4R Tau Ratio          | 0.95                     |                              |                                        |
| sEV 3R/4R Tau Ratio<br>PRAUC | 0.90                     | 0.87 to 0.96                 | 0.00015 for bvFTD                      |
| mEV 3R/4R Tau Ratio          | 0.96                     |                              |                                        |
| mEV 3R/4R Tau Ratio<br>PRAUC | 0.88                     | 0.81 to 0.90                 | 0.00015 for bvFTD                      |
| <b>bvFTD vs ALS</b>          |                          |                              |                                        |
| sEV 3R/4R Tau Ratio          | 0.90                     |                              |                                        |
| sEV 3R/4R Tau Ratio<br>PRAUC | 0.86-0.87                | 0.81 to 0.90<br>0.83 to 0.92 | 0.00015 for bvFTD<br>/0.000006 for ALS |
| mEV 3R/4R Tau Ratio          | 0.93                     |                              |                                        |
| mEV 3R/4R Tau Ratio<br>PRAUC | 0.83-0.84                | 0.78 to 0.91<br>0.80 to 0.93 | 0.00015 for bvFTD<br>/0.000006 for ALS |
| <b>bvFTD vs ALS-FTD</b>      |                          |                              |                                        |
| sEV 3R/4R Tau Ratio          | 0.96                     |                              |                                        |

|                                   |                  |                              |                                          |
|-----------------------------------|------------------|------------------------------|------------------------------------------|
| sEV 3R/4R Tau Ratio<br>PRAUC      | 0.91             | 0.90 to 0.98                 | 0.00015 for bvFTD                        |
| mEV 3R/4R Tau Ratio               | 0.97             |                              |                                          |
| mEV 3R/4R Tau Ratio<br>PRAUC      | 0.90             | 0.86 to 0.95                 | 0.00015 for bvFTD                        |
| <b>Sant Pau cohort</b>            | ROCAUC/<br>PRAUC | 95% CI                       | Disease Prevalence                       |
| <b>ALS vs HC</b>                  |                  |                              |                                          |
| sEV TDP-43 (pg/mL)                | 0.94             |                              |                                          |
| sEV TDP-43 (pg/mL)<br>PRAUC       | 0.89             | 0.86 to 0.91                 | 0.000006 for ALS                         |
| mEV TDP-43 (pg/mL)                | 0.93             |                              |                                          |
| mEV 3R/4R TDP-43<br>(pg/mL) PRAUC | 0.86             | 0.83 to 0.92                 | 0.000006 for ALS                         |
| <b>ALS vs. ALS-FTD</b>            |                  |                              |                                          |
| sEV TDP-43 (pg/mL)                | 0.58             |                              |                                          |
| sEV TDP-43 (pg/mL)<br>PRAUC       | 0.45             | 0.38 to 0.52                 | 0.000006 for ALS                         |
| mEV TDP-43 (pg/mL)                | 0.56             |                              |                                          |
| mEV TDP-43 (pg/mL)<br>PRAUC       | 0.49             | 0.41 to 0.53                 | 0.000006 for ALS                         |
| <b>ALS vs. PSP</b>                |                  |                              |                                          |
| sEV TDP-43 (pg/mL)                | 0.96             |                              |                                          |
| sEV TDP-43 (pg/mL)<br>PRAUC       | 0.91-0.92        | 0.85 to 0.96<br>0.86 to 0.95 | 0.000006 for<br>ALS/0.00005 for<br>PSP   |
| mEV TDP-43 (pg/mL)                | 0.96             |                              |                                          |
| mEV TDP-43 (pg/mL)<br>PRAUC       | 0.90-0.92        | 0.86 to 0.93<br>0.89 to 0.95 | 0.000006 for<br>ALS/0.00005 for<br>PSP   |
| sEV and mEV AUC<br>comparison     |                  |                              |                                          |
| <b>ALS vs. bvFTD</b>              |                  |                              |                                          |
| sEV TDP-43 (pg/mL)                | 0.76             |                              |                                          |
| sEV TDP-43 (pg/mL)<br>PRAUC       | 0.74-0.75        | 0.71 to 0.82<br>0.70 to 0.83 | 0.000006 for<br>ALS/0.00015 for<br>bvFTD |
| mEV TDP-43 (pg/mL)                | 0.76             |                              |                                          |
| mEV TDP-43 (pg/mL)<br>PRAUC       | 0.73-0.74        | 0.68 to 0.80<br>0.70 to 0.82 | 0.000006 for<br>ALS/0.00015 for<br>bvFTD |
| <b>bvFTD vs HC</b>                |                  |                              |                                          |
| sEV TDP-43 (pg/mL)                | 0.87             |                              |                                          |
| sEV (pg/mL) PRAUC                 | 0.83             | 0.78 to 0.89                 | 0.00015 for bvFTD                        |
| mEV TDP-43 (pg/mL)                | 0.82             |                              |                                          |
| mEV TDP-43 (pg/mL)<br>PRAUC       | 0.78             | 0.76 to 0.85                 | 0.00015 for bvFTD                        |
| Plasma Nfl (pg/mL)                | 0.78             |                              |                                          |
| Plasma Nfl (pg/mL)<br>PRAUC       | 0.65             | 0.60 to 0.75                 |                                          |
| <b>bvFTD vs. ALS-FTD</b>          |                  |                              |                                          |
| sEV TDP-43 (pg/mL)                | 0.82             |                              |                                          |

|                                                                                                                                                                            |            |                              |                                         |
|----------------------------------------------------------------------------------------------------------------------------------------------------------------------------|------------|------------------------------|-----------------------------------------|
| sEV TDP-43 (pg/mL)<br>PRAUC                                                                                                                                                | 0.78       | 0.75 to 0.85                 | 0.00015 for bvFTD                       |
| mEV TDP-43 (pg/mL)                                                                                                                                                         | 0.81       |                              |                                         |
| mEV TDP-43 (pg/mL)<br>PRAUC                                                                                                                                                | 0.76       | 0.72 to 0.84                 | 0.00015 for bvFTD                       |
| <b>bvFTD vs. PSP</b>                                                                                                                                                       |            |                              |                                         |
| sEV TDP-43 (pg/mL)                                                                                                                                                         | 0.91       |                              |                                         |
| sEV TDP-43 (pg/mL)<br>PRAUC                                                                                                                                                | 0.88-0.90  | 0.84 to 0.92<br>0.88 to 0.96 | 0.00015 for<br>bvFTD/0.00005 for<br>PSP |
| mEV TDP-43 (pg/mL)                                                                                                                                                         | 0.89       |                              |                                         |
| mEV 3R/4R TDP-43<br>(pg/mL) PRAUC                                                                                                                                          | 0.87 -0.88 | 0.85 to 0.93<br>0.84 to 0.95 | 0.00015 for<br>bvFTD/0.00005 for<br>PSP |
| Plasma Nfl (pg/mL)                                                                                                                                                         | 0.71       |                              |                                         |
| Plasma Nfl (pg/mL)<br>PRAUC                                                                                                                                                | 0.60-0.61  | 0.58 to 0.70<br>0.55 to 0.72 | 0.00015 for<br>bvFTD/0.00005 for<br>PSP |
| <b>ALS-FTD vs. HC</b>                                                                                                                                                      |            |                              |                                         |
| sEV TDP-43 (pg/mL)                                                                                                                                                         | 0.98       |                              |                                         |
| sEV TDP-43 (pg/mL)<br>PRAUC                                                                                                                                                | 0.94       | 0.90 to 0.98                 | 0.000006 for ALS                        |
| mEV TDP-43 (pg/mL)                                                                                                                                                         | 0.98       |                              |                                         |
| mEV 3R/4R TDP-43<br>(pg/mL) PRAUC                                                                                                                                          | 0.93       | 0.90 to 0.97                 | 0.000006 for ALS                        |
| <b>ALS-FTD vs. PSP</b>                                                                                                                                                     |            |                              |                                         |
| sEV TDP-43 (pg/mL)                                                                                                                                                         | 0.99       |                              |                                         |
| sEV TDP-43 (pg/mL)<br>PRAUC                                                                                                                                                | 0.95-0.94  | 0.91 to 0.99<br>0.89 to 0.96 | 0.000006 for<br>ALS/0.00005 for<br>PSP  |
| mEV TDP-43 (pg/mL)                                                                                                                                                         | 0.99       |                              |                                         |
| mEV 3R/4R TDP-43<br>(pg/mL) PRAUC                                                                                                                                          | 0.94-0.93  | 0.89 to 0.98<br>0.88 to 0.96 | 0.000006 for<br>ALS/0.00005 for<br>PSP  |
| ALS prevalence 0.6 - 3.8 per 100 000 persons <sup>1</sup><br>PSP prevalence 5–7 per 100,000 persons <sup>2</sup><br>bvFTD prevalence 15-22 per 100 000 person <sup>3</sup> |            |                              |                                         |

1. Longinetti, E. & Fang, F. Epidemiology of amyotrophic lateral sclerosis: an update of recent literature. *Curr Opin Neurol* **32**, 771-776 (2019). <https://doi.org:10.1097/WCO.0000000000000730>
2. Barer, Y. *et al.* Epidemiology of Progressive Supranuclear Palsy: Real World Data from the Second Largest Health Plan in Israel. *Brain Sci* **12** (2022). <https://doi.org:10.3390/brainsci12091126>
3. Onyike, C. U. & Diehl-Schmid, J. The epidemiology of frontotemporal dementia. *Int Rev Psychiatry* **25**, 130-137 (2013). <https://doi.org:10.3109/09540261.2013.776523>
